# Supplementary material
Source: publisher site journal article supplement (https://www.dovepress.com/article/378247)
Supplement: Supplementary file 1 [file get_supplementary_file.php]

**Supplement materials**

**Supplement material 1.** Quality control standard of lung function

**Supplement table 1.** Characteristics of participants according to both COPD-SQ and lung function.

**Supplement table 2.** The relationship between BMI and lung function according to COPD-SQ scores in males.

**Supplement table 3.** The relationship between BMI and lung function according to COPD-SQ scores in females.

**Supplement table 4.** The relationship between BMI and lung function according to lung function test in males.

**Supplement table 5.** The relationship between BMI and lung function according to lung function test in females.

**Supplement table 6.** The relationship between BMI and lung function according to COPD-SQ scores among participants older than 40 years old.

**Supplement table 7.** The relationship between BMI and lung function according to lung function test among participants older than 40 years old.

**Supplement table 8.** The relationship between BMI and lung function according to COPD-SQ scores among non-smokers.

**Supplement table 9.** The relationship between BMI and lung function according to lung function test among non-smokers.

**Supplement table 10.** The relationship between BMI and lung function according to COPD-SQ scores using predicted value.

**Supplement table 11.** The relationship between BMI and lung function according to lung function test using predicted value.

**Supplement figure 1.** The relationship between BMI and lung function according to COPD-SQ scores in males.

**Supplement figure 2.** The relationship between BMI and lung function according to COPD-SQ scores in females.

**Supplement figure 3.** The relationship between BMI and lung function according to lung function test in males.

**Supplement figure 4.** The relationship between BMI and lung function according to lung function test in females.

**Supplement material 1.** Quality control standard of lung function

1. Judgement criteria of single pulmonary function: if any one of the following 4 items is satisfied, it is unqualified

(A) Hesitant to initiate exhalation: extrapolated volume>5%×FVC and extrapolated volume>150ml;

(B) The degree of exertion: during exhalation, the ratio of the time when the point of maximum flow rate (PEF) appears and the total insufflation time> 30%;

(C) Cough: during one exhalation, continuously record the lowest flow rate value (Fmin) from the peak of exhalation. If the current flow rate> Fmin + 2000ml/s, it is judged that cough occurs;

(D) The expiratory time is too short: the exhalation time is less than 6 seconds.

2. Overall lung function:

(A) Blow out at least 3 qualified curves;

(B) The difference between the two largest FEV1 or FVC does not exceed 150ml in 3 qualified curves.

**Supplement table 1.** Characteristics of participants according to both COPD-SQ and lung function.

|  | At risk and PRISm | Not at risk and normal spirometry | p value |
| --- | --- | --- | --- |
| Number (n) | 3,086 | 11,214 |  |
| Age (year, mean±SD) | 64.90±9.01 | 51.80±11.07 | <0.001 |
| Sex |  |  | <0.001 |
| Male (n, %) | 2,074 (67.21%) | 4,959 (44.22%) |  |
| Female (n, %) | 1,012 (32.79%) | 6,255 (55.78%) |  |
| BMI (kg/m2, mean±SD) | 23,72±3.49 | 24.90±3.30 | <0.001 |
| Smoker (n, %) | 1,826 (59.17%) | 3,165 (28.22%) | <0.001 |
| Symptom |  |  |  |
| Cough (n, %) | 1,620 (52.50%) | 1,368 (12.20%) | <0.001 |
| Breathlessness (n, %) | 2,223 (72.03%) | 2,965 (26.44%) | <0.001 |
| Biofuel exposure (n, %) | 1,922 (62.28%) | 7,003 (62.45%) | 0.865 |
| Family history (n, %) | 913 (29.59%) | 1,258 (11.22%) | <0.001 |
| COPD-SQ (score, mean±SD) | 20.12±3.84 | 9.02±3.96 | <0.001 |
| Lung function |  |  |  |
| FEV1 (l, mean±SD) | 1.68±0.54 | 2.74±0.69 | <0.001 |
| FVC (l, mean±SD) | 2.12±0.72 | 3.35±0.84 | <0.001 |
| FEV1/FVC (mean±SD) | 0.81±0.11 | 0.82±0.06 | <0.001 |

Abbreviations: BMI, body mass index; COPD-SQ, the COPD Screening Questionnaire; COPD, Chronic Obstructive Pulmonary Disease; PRISm preserved ratio impaired spirometry; FEV1, the forced expiratory volume in one second; FVC, the forced vital capacity.

**Supplement table 2.** The relationship between BMI and lung function according to COPD-SQ scores in males.

| Male participants | BMI | FEV1 | | FVC | | FEV1/FVC | |
| --- | --- | --- | --- | --- | --- | --- | --- |
| unadjusted | adjusted | unadjusted | adjusted | unadjusted | adjusted |
| People not at risk of COPD | BMI<18.5 | -0.02 (-0.27, 0.22) | -0.35 (-0.61, -0.09) | 0.06 (-0.13, 0.24) | -0.18 (-0.40, 0.05) | -2.24 (-3.87, -0.62) | -2.64 (-4.22, -1.06) |
| 18.5≤BMI<23.9 | Ref | Ref | Ref | Ref | Ref | Ref |
| 24.0≤BMI<27.9 | -0.11 (-0.18, -0.05) | 0.10 (0.02, 0.18) | -0.14 (-0.20, -0.09) | -0.02 (-0.08, 0.04) | 0.87 (0.35, 1.39) | 1.75 (1.20, 2.30) |
| 28.0≤BMI<34.9 | -0.08 (-0.17, 0.01) | 0.04 (-0.07, 0.14) | -0.14 (-0.21, -0.07) | -0.10 (-0.18, -0.01) | 1.16 (0.46, 1.86) | 1.93 (1.19, 2.66) |
| BMI≥35.0 | -0.07 (-0.51, 0.38) | -0.13 (-0.61, 0.34) | 0.10 (-0.19, 0.39) | 0.07 (-0.31, 0.45) | -1.47 (-4.58, 1.64) | -0.97 (-4.05, 2.12) |
| People at risk of COPD | BMI<18.5 | -0.65 (-0.75, -0.55) | -0.67 (-0.78, -0.56) | -0.55 (-0.63, -0.47) | -0.56 (-0.65, -0.47) | -2.42 (-2.95, -1.89) | -2.22 (-2.78, -1.65) |
| 18.5≤BMI<23.9 | Ref | Ref | Ref | Ref | Ref | Ref |
| 24.0≤BMI<27.9 | 0.16 (0.11, 0.22) | 0.32 (0.25, 0.38) | 0.00 (-0.01, 0.01) | 0.00 (-0.01, 0.02) | 1.62 (1.29, 1.96) | 2.49 (2.13, 2.86) |
| 28.0≤BMI<34.9 | 0.20 (0.11, 0.29) | 0.33 (0.23, 0.43) | 0.00 (-0.02, 0.02) | 0.00 (-0.02, 0.03) | 2.06 (1.52, 2.61) | 3.01 (2.44, 3.58) |
| BMI≥35.0 | -0.13 (-0.66, 0.40) | -0.26 (-0.82, 0.31) | -0.24 (-0.71, 0.23) | -0.42 (-0.92, 0.08) | 0.76 (-2.56, 4.08) | 1.32 (-2.09, 4.73) |

Abbreviations: BMI, body mass index; COPD-SQ, the COPD Screening Questionnaire; COPD, Chronic Obstructive Pulmonary Disease; FEV1, the forced expiratory volume in one second; FVC, the forced vital capacity.

Adjusted model: sex, age, smoke, cough, breath shortness, biofuel use and family history

**Supplement figure 1.** The relationship between BMI and lung function according to COPD-SQ scores in males.


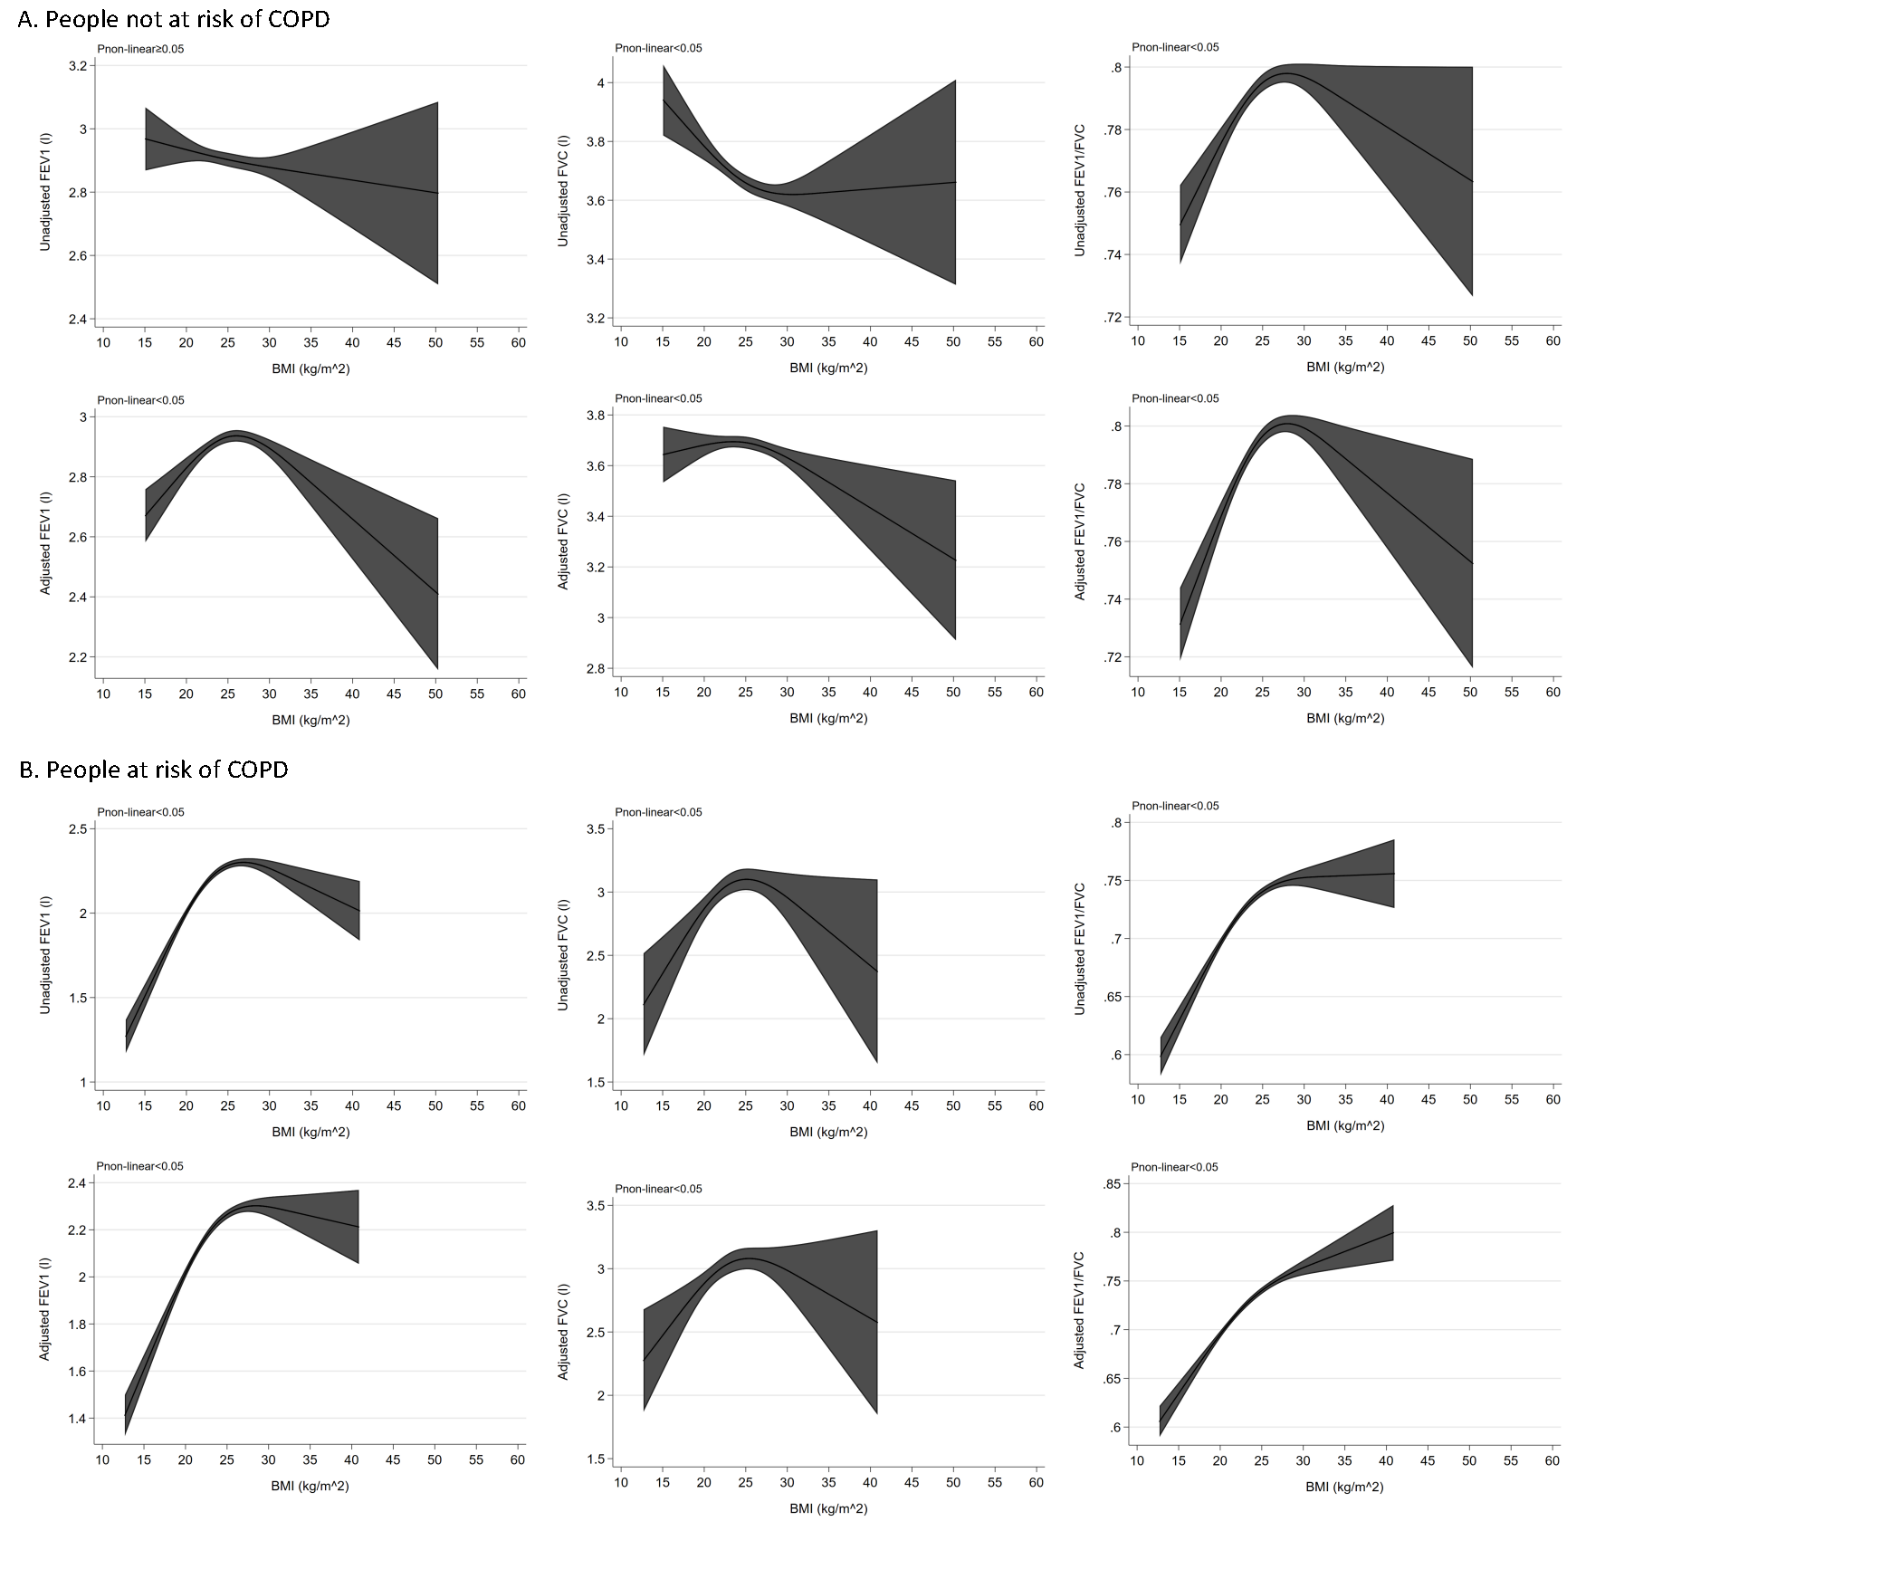


Abbreviations: BMI, body mass index; COPD-SQ, the COPD Screening Questionnaire; COPD, Chronic Obstructive Pulmonary Disease; FEV1, the forced expiratory volume in one second; FVC, the forced vital capacity.

Adjusted model: sex, age, smoke, cough, breath shortness, biofuel use and family history

**Supplement table 3.** The relationship between BMI and lung function according to COPD-SQ scores in females.

| Female participants | BMI | FEV1 | | FVC | | FEV1/FVC | |
| --- | --- | --- | --- | --- | --- | --- | --- |
| unadjusted | adjusted | unadjusted | adjusted | unadjusted | adjusted |
| People not at risk of COPD | BMI<18.5 | -0.15 (-0.42, 0.12) | -0.66 (-0.97, -0.36) | 0.00 (-0.22, 0.22) | -0.36 (-0.62, -0.10) | -2.66 (-4.28, -1.04) | -3.34 (-4.99, -1.70) |
| 18.5≤BMI<23.9 | Ref | Ref | Ref | Ref | Ref | Ref |
| 24.0≤BMI<27.9 | -0.37 (-0.46, -0.29) | -0.06 (-0.16, 0.03) | -0.32 (-0.39, -0.25) | -0.09 (-0.17, -0.01) | -0.03 (-0.57, 0.51) | 0.62 (0.06, 1.18) |
| 28.0≤BMI<34.9 | -0.63 (-0.75, -0.52) | -0.29 (-0.42, -0.17) | -0.52 (-0.62, -0.43) | -0.28 (-0.38, -0.17) | -0.68 (-1.39, 0.02) | 0.36 (-0.37, 1.09) |
| BMI≥35.0 | -0.92 (-1.40, -0.44) | -0.81 (-1.34, -0.29) | -0.80 (-1.21, -0.39) | -0.76 (-1.21, -0.32) | 0.32 (-2.77, 3.41) | 1.31 (-1.78, 4.40) |
| People at risk of COPD | BMI<18.5 | -0.47 (-0.64, -0.31) | -0.50 (-0.69, -0.32) | -0.29 (-0.44, -0.15) | -0.27 (-0.42, -0.11) | -2.60 (-3.37, -1.82) | -2.95 (-3.78, -2.13) |
| 18.5≤BMI<23.9 | Ref | Ref | Ref | Ref | Ref | Ref |
| 24.0≤BMI<27.9 | 0.11 (0.02, 0.20) | 0.34 (0.23, 0.44) | 0.08 (0.00, 0.16) | 0.23 (0.14, 0.32) | 0.69 (0.20, 1.19) | 1.61 (1.09, 2.14) |
| 28.0≤BMI<34.9 | -0.09 (-0.23, 0.05) | 0.19 (0.04, 0.35) | -0.12 (-0.24, 0.01) | 0.07 (-0.07, 0.20) | 0.62 (-0.13, 1.36) | 1.98 (1.22 2.75) |
| BMI≥35.0 | -0.27 (-0.91, 0.38) | 0.40 (-0.24, 1.05) | -0.30 (-0.87, 0.27) | 0.22 (-0.36, 0.80) | 0.49 (-2.90, 3.88) | 2.52 (-0.71, 5.75) |

Abbreviations: BMI, body mass index; COPD-SQ, the COPD Screening Questionnaire; COPD, Chronic Obstructive Pulmonary Disease; FEV1, the forced expiratory volume in one second; FVC, the forced vital capacity.

Adjusted model: sex, age, smoke, cough, breath shortness, biofuel use and family history

**Supplement figure 2.** The relationship between BMI and lung function according to COPD-SQ scores in females.


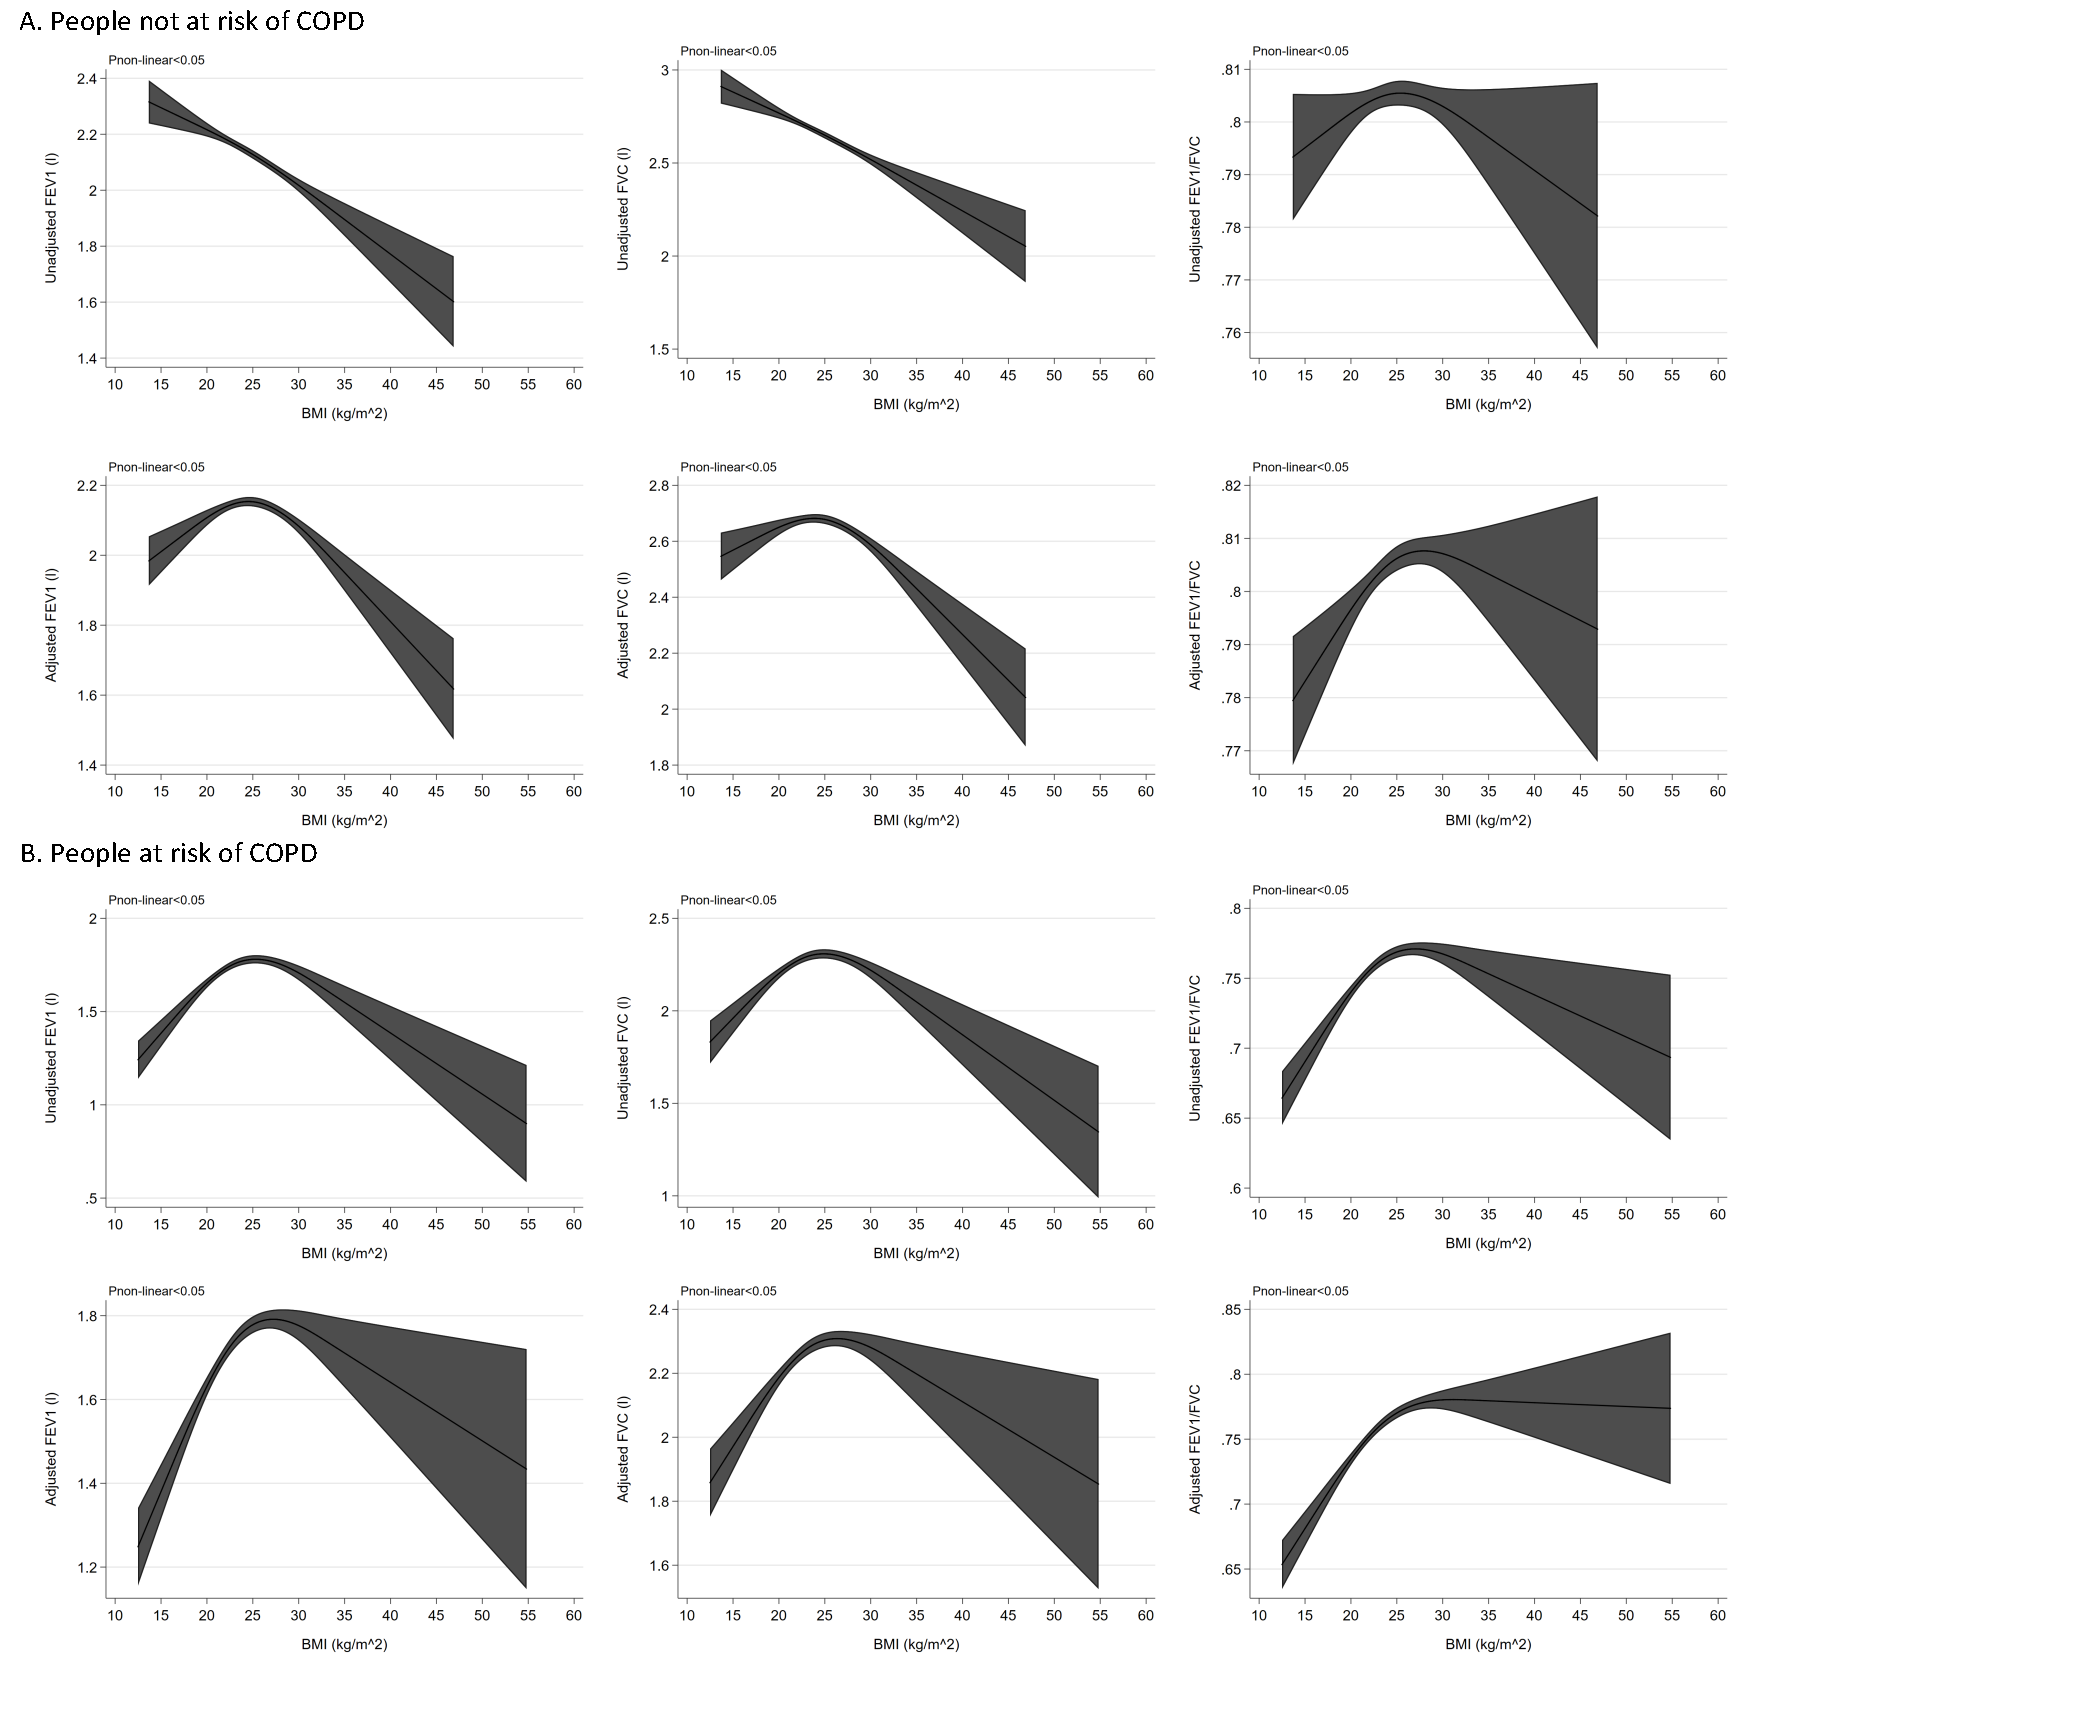


Abbreviations: BMI, body mass index; COPD-SQ, the COPD Screening Questionnaire; COPD, Chronic Obstructive Pulmonary Disease; FEV1, the forced expiratory volume in one second; FVC, the forced vital capacity.

Adjusted model: sex, age, smoke, cough, breath shortness, biofuel use and family history

**Supplement table 4.** The relationship between BMI and lung function according to lung function test in males.

| Male participants | BMI | FEV1 | | FVC | | FEV1/FVC | |
| --- | --- | --- | --- | --- | --- | --- | --- |
| unadjusted | adjusted | unadjusted | adjusted | unadjusted | adjusted |
| People with normal spirometry | BMI<18.5 | -0.47 (-0.69, -0.24) | -0.40 (-0.69, -0.12) | -0.33 (-0.51, -0.15) | -0.24 (-0.45, -0.02) | -1.93 (-4.01, 0.15) | -1.68 (-3.74, 0.38) |
| 18.5≤BMI<23.9 | Ref | Ref | Ref | Ref | Ref | Ref |
| 24.0≤BMI<27.9 | 0.19 (0.12, 0.27) | 0.02 (-0.08, 0.12) | 0.09 (0.03, 0.16) | -0.06 (-0.14, 0.01) | 1.99 (1.30, 2.69) | 1.62 (0.92, 2.33) |
| 28.0≤BMI<34.9 | 0.34 (0.23, 0.45) | -0.09 (-0.23, 0.05) | 0.16 (0.07, 0.25) | -0.20 (-0.32, -0.09) | 3.04 (2.08, 4.00) | 2.38 (1.38, 3.38) |
| BMI≥35.0 | 0.23 (-0.43, 0.90) | -0.90 (-1.85, 0.05) | 0.13 (-0.41, 0.67) | -0.61 (-1.32, 0.10) | 2.01 (-3.93, 7.94) | -0.11 (-6.53, 6.30) |
| People with PRISm | BMI<18.5 | -0.65 (-0.94, -0.37) | -0.61 (-0.95, -0.26) | -0.43 (-0.65, -0.22) | -0.36 (-0.62, -0.11) | -0.10 (-1.85, 1.65) | -0.01 (-1.59, 1.57) |
| 18.5≤BMI<23.9 | Ref | Ref | Ref | Ref | Ref | Ref |
| 24.0≤BMI<27.9 | 0.21 (0.07, 0.34) | 0.24 (0.07, 0.41) | 0.14 (0.04, 0.24) | 0.14 (0.02, 0.27) | 0.20 (-0.50, 0.90) | 0.12 (-0.58, 0.81) |
| 28.0≤BMI<34.9 | 0.47 (0.28, 0.67) | 0.28 (0.03, 0.53) | 0.35 (0.20, 0.50) | 0.22 (0.04, 0.39) | -0.32 (-1.45, 0.81) | -0.64 (-1.86, 0.57) |
| BMI≥35.0 | 1.07 (0.09, 2.04) | 0.85 (-0.41, 2.10) | 0.93 (0.17, 1.69) | 0.73 (-0.16, 1.63) | -3.65 (-10.68, 3.38) | -4.00 (-11.46, 3.46) |
| People with obstructive spirometry | BMI<18.5 | -0.79 (-0.95, -0.62) | -0.78 (-0.97, -0.59) | -0.59 (-0.70, -0.48) | -0.56 (-0.68, -0.43) | -2.50 (-3.46, -1.54) | -2.19 (-3.20, -1.17) |
| 18.5≤BMI<23.9 | Ref | Ref | Ref | Ref | Ref | Ref |
| 24.0≤BMI<27.9 | 0.25 (0.17, 0.34) | 0.26 (0.15, 0.36) | 0.00 (-0.01, 0.01) | 0.00 (-0.01, 0.01) | 1.93 (1.19, 2.67) | 2.14 (1.37, 2.91) |
| 28.0≤BMI<34.9 | 0.34 (0.19, 0.48) | 0.20 (0.03, 0.37) | 0.00 (-0.01, 0.02) | -0.01 (-0.11, 0.08) | 3.70 (2.31, 5.08) | 3.90 (2.48, 5.33) |
| BMI≥35.0 | 0.57 (-0.08, 1.22) | 0.15 (-0.58, 0.87) | 0.01 (-0.03, 0.05) | 0.00 (-0.08, 0.09) | 2.16 (-4.16, 8.48) | 2.50 (-3.78, 8.78) |

Abbreviations: BMI, body mass index; COPD, Chronic Obstructive Pulmonary Disease; PRISm preserved ratio impaired spirometry; FEV1, the forced expiratory volume in one second; FVC, the forced vital capacity.

Adjusted model: sex, age, smoke, cough, breath shortness, biofuel use and family history

**Supplement figure 3.** The relationship between BMI and lung function according to lung function test in males.


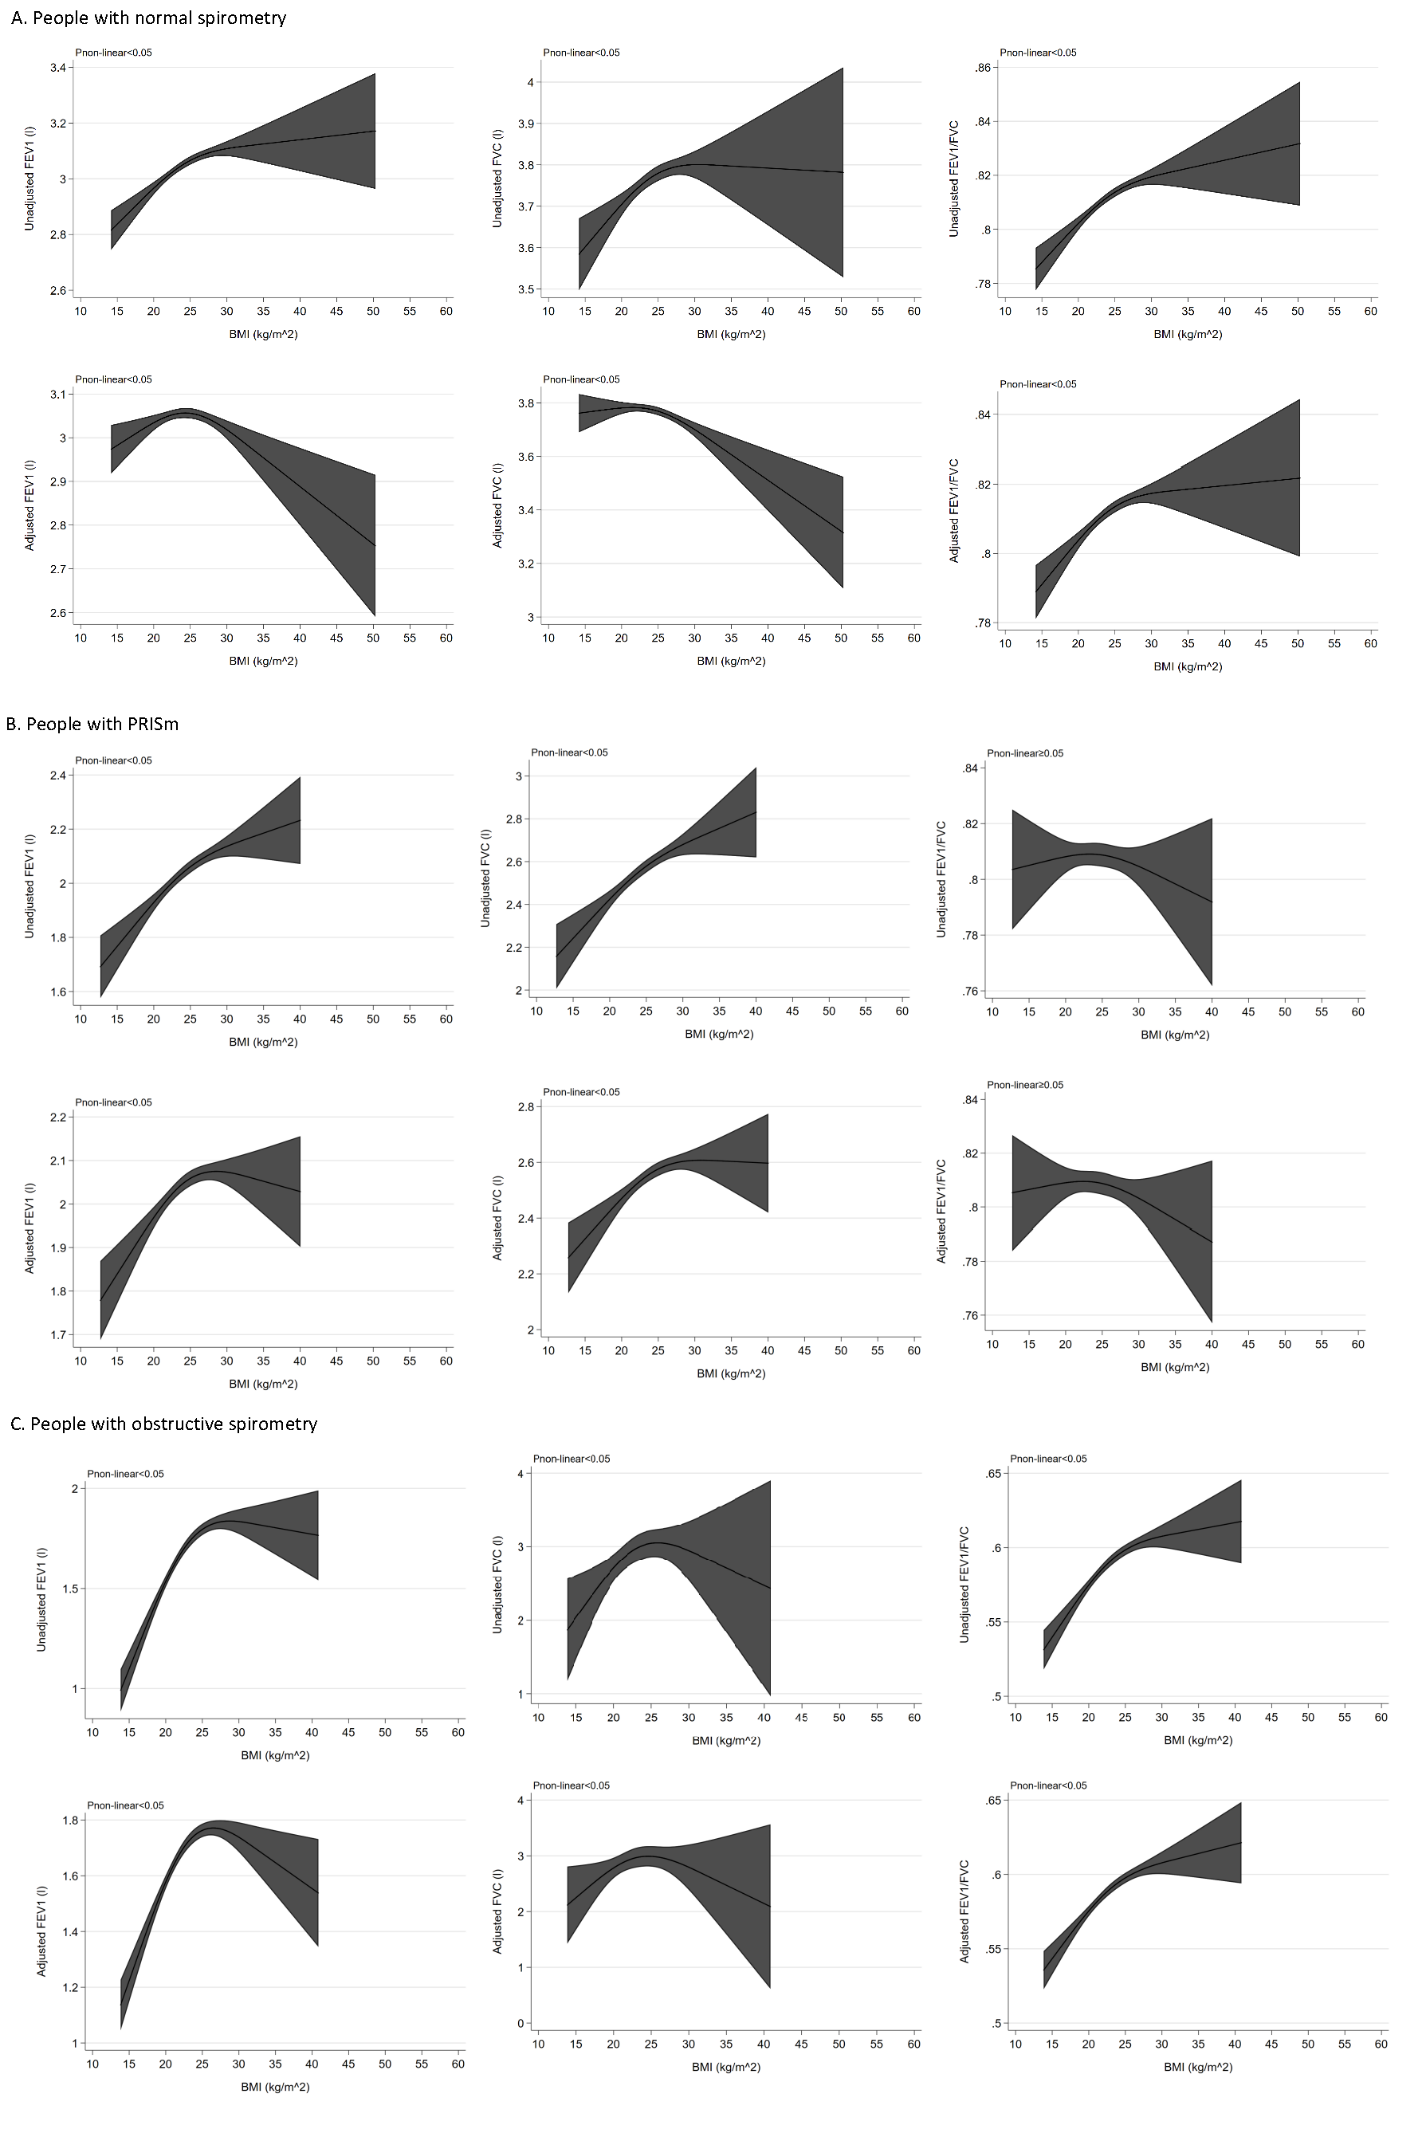


Abbreviations: BMI, body mass index; COPD, Chronic Obstructive Pulmonary Disease; PRISm preserved ratio impaired spirometry; FEV1, the forced expiratory volume in one second; FVC, the forced vital capacity.

Adjusted model: sex, age, smoke, cough, breath shortness, biofuel use and family history

**Supplement table 5.** The relationship between BMI and lung function according to lung function test in females.

| Female participants | BMI | FEV1 | | FVC | | FEV1/FVC | |
| --- | --- | --- | --- | --- | --- | --- | --- |
| unadjusted | adjusted | unadjusted | adjusted | unadjusted | adjusted |
| People with normal spirometry | BMI<18.5 | -0.21 (-0.45, 0.03) | -0.09 (-0.37, 0.19) | -0.19 (-0.39, 0.01) | -0.09 (-0.32, 0.14) | -0.36 (-2.21, 1.50) | -0.12 (-1.98, 1.73) |
| 18.5≤BMI<23.9 | Ref | Ref | Ref | Ref | Ref | Ref |
| 24.0≤BMI<27.9 | -0.20 (-0.29, -0.10) | -0.06 (-0.17, 0.05) | -0.18 (-0.25, -0.10) | -0.08 (-0.17, 0.01) | 0.17 (-0.52, 0.86) | 0.43 (-0.26, 1.13) |
| 28.0≤BMI<34.9 | -0.49 (-0.63, -0.36) | -0.52 (-0.68, -0.35) | -0.41 (-0.52, -0.30) | -0.43 (-0.56, -0.30) | -0.22 (-1.19, 0.75) | 0.15 (-0.83, 1.12) |
| BMI≥35.0 | -1.07 (-1.74, -0.40) | -1.22 (-2.09, -0.35) | -0.90 (-1.44, -0.37) | -1.01 (-1.67, -0.35) | 0.95 (-3.28, 5.18) | 1.59 (-2.58, 5.76) |
| People with PRISm | BMI<18.5 | -0.61 (-1.07, -0.14) | -0.42 (-1.01, 0.17) | -0.40 (-0.75, -0.05) | -0.24 (-0.66, 0.19) | -0.06 (-2.28, 2.15) | -0.18 (-2.38, 2.02) |
| 18.5≤BMI<23.9 | Ref | Ref | Ref | Ref | Ref | Ref |
| 24.0≤BMI<27.9 | -0.12 (-0.32, 0.08) | 0.14 (-0.12, 0.40) | -0.10 (-0.25, 0.05) | 0.06 (-0.12, 0.25) | 0.10 (-0.82, 1.03) | 0.06 (-0.87, 1.00) |
| 28.0≤BMI<34.9 | -0.35 (-0.61, -0.09) | -0.01 (-0.35, 0.33) | -0.22 (-0.42, -0.03) | 0.01 (-0.23, 0.25) | -0.45 (-1.70, 0.79) | -0.49 (-1.73, 0.76) |
| BMI≥35.0 | -0.18 (-1.30, 0.94) | -0.70 (-2.04, 0.63) | -0.14 (-0.98, 0.70) | -0.47 (-1.45, 0.51) | 0.02 (-5.21, 5.25) | 0.12 (-5.34, 5.57) |
| People with obstructive spirometry | BMI<18.5 | -0.74 (-1.07, -0.40) | -0.84 (-1.21, -0.46) | -0.32 (-0.54, -0.10) | -0.34 (-0.59, -0.09) | -3.96 (-5.49, -2.43) | -4.07 (-5.66, -2.49) |
| 18.5≤BMI<23.9 | Ref | Ref | Ref | Ref | Ref | Ref |
| 24.0≤BMI<27.9 | 0.37 (0.19, 0.55) | 0.37 (0.16, 0.58) | 0.19 (0.07, 0.31) | 0.17 (0.04, 0.31) | 3.19 (1.94, 4.45) | 3.29 (2.00, 4.59) |
| 28.0≤BMI<34.9 | 0.28 (0.04, 0.53) | 0.33 (0.04, 0.61) | 0.13 (-0.04, 0.30) | 0.13 (-0.07, 0.32) | 3.28 (1.48, 5.08) | 3.75 (1.88, 5.62) |
| BMI≥35.0 | 0.56 (-0.38, 1.50) | 0.91 (-0.11, 1.93) | 0.10 (-0.57, 0.77) | 0.24 (-0.48, 0.95) | 20.31 (4.73, 35.89) | 23.50 (7.00, 40.00) |

Abbreviations: BMI, body mass index; COPD, Chronic Obstructive Pulmonary Disease; PRISm preserved ratio impaired spirometry; FEV1, the forced expiratory volume in one second; FVC, the forced vital capacity.

Adjusted model: sex, age, smoke, cough, breath shortness, biofuel use and family history

**Supplement figure 4.** The relationship between BMI and lung function according to lung function test in females.


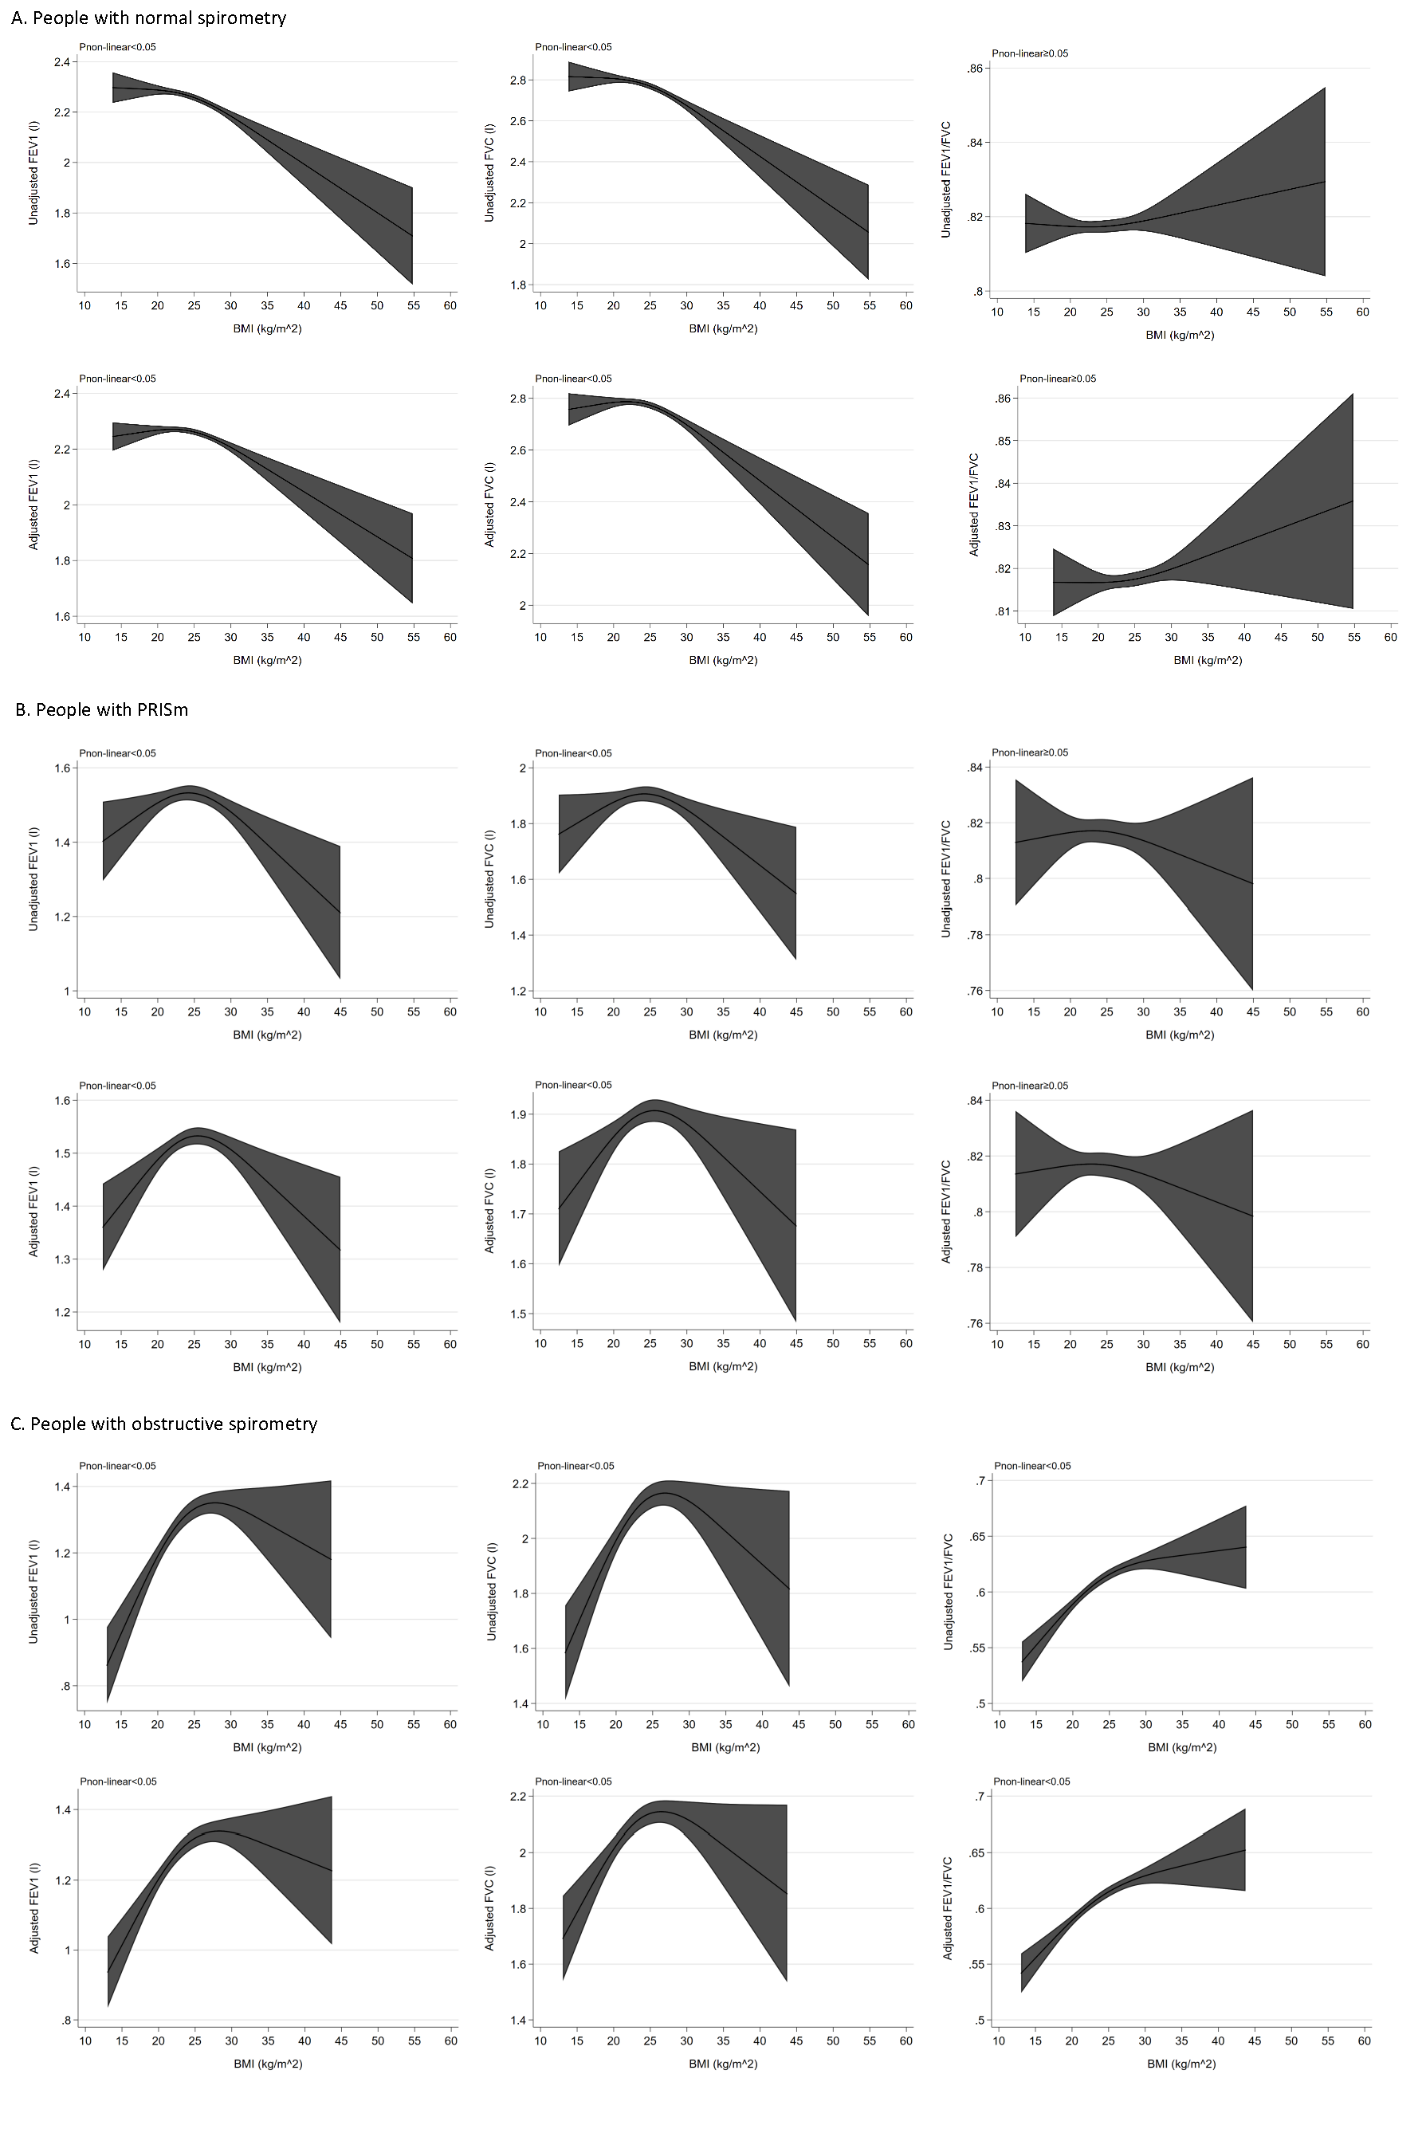


Abbreviations: BMI, body mass index; COPD, Chronic Obstructive Pulmonary Disease; PRISm preserved ratio impaired spirometry; FEV1, the forced expiratory volume in one second; FVC, the forced vital capacity.

Adjusted model: sex, age, smoke, cough, breath shortness, biofuel use and family history

**Supplement table 6.** The relationship between BMI and lung function according to COPD-SQ scores among participants older than 40 years old.

| Participants | | BMI | FEV1 | | FVC | | FEV1/FVC | |
| --- | --- | --- | --- | --- | --- | --- | --- | --- |
| unadjusted | adjusted | unadjusted | adjusted | unadjusted | adjusted |
| Total | People not at risk of COPD | BMI<18.5 | -0.42 (-0.62, -0.22) | -0.56 (-0.80, 0.31) | -0.22 (-0.38, -0.05) | -0.26 (-0.47, -0.05) | -3.26 (-4.56, -1.96) | -3.48 (-4.80, -2.16) |
| 18.5≤BMI<23.9 | Ref | Ref | Ref | Ref | Ref | Ref |
| 24.0≤BMI<27.9 | -0.01 (-0.06, 0.04) | 0.02 (-0.04, 0.09) | -0.03 (-0.07, 0.01) | -0.07 (-0.12, -0.01) | 0.57 (0.18, 0.97) | 1.27 (0.86, 1.69) |
| 28.0≤BMI<34.9 | -0.17 (-0.23, -0.10) | -0.10 (-0.19, -0.02) | -0.16 (-0.22, -0.11) | -0.18 (-0.25, -0.11) | 0.32 (-0.21, 0.84) | 1.17 (0.63, 1.72) |
| BMI≥35.0 | -0.64 (-0.99, -0.30) | -0.48 (-0.88, -0.08) | -0.53 (-0.81, -0.24) | -0.46 (-0.80, -0.12) | -0.21 (-2.73, 2.31) | 0.73 (-1.78, 3.23) |
| People at risk of COPD | BMI<18.5 | -0.63 (0.71, -0.54) | -0.64 (-0.73, -0.54) | -0.47 (-0.54, -0.40) | -0.51 (-0.59, -0.43) | -2.42 (-2.85, -1.98) | -2.43 (-2.90, -1.96) |
| 18.5≤BMI<23.9 | Ref | Ref | Ref | Ref | Ref | Ref |
| 24.0≤BMI<27.9 | 0.13 (0.08, 0.17) | 0.33 (0.27, 0.38) | 0.00 (-0.01, 0.01) | 0.01 (-0.01 ,0.03) | 1.34 (1.06, 1.62) | 2.21 (1.91, 2.51) |
| 28.0≤BMI<34.9 | 0.03 (-0.05, 0.10) | 0.30 (0.22, 0.39) | -0.10 (-0.16, -0.03) | 0.01 (-0.02, 0.03) | 1.67 (1.23, 2.11) | 2.66 (2.20, 3.11) |
| BMI≥35.0 | -0.35 (-0.74, 0.05) | 0.11 (-0.34, 0.56) | -0.43 (-0.78, -0.09) | -0.15 (-0.54, 0.25) | 1.07 (-1.26, 3.39) | 2.32 (0.01, 4.63) |
| Male | People not at risk of COPD | BMI<18.5 | -0.33 (-0.66, -0.01) | -0.29 (-0.63, 0.06) | -0.15 (-0.43, 0.13) | -0.09 (-0.38, 0.21) | -2.91 (-4.87, -0.95) | -2.52 (-4.46, -0.58) |
| 18.5≤BMI<23.9 | Ref | Ref | Ref | Ref | Ref | Ref |
| 24.0≤BMI<27.9 | -0.06 (-0.13, 0.02) | 0.09 (0.01, 0.18) | -0.12 (-0.18, -0.06) | -0.04 (-0.11, 0.03) | 1.21 (0.65, 1.77) | 1.90 (1.32, 2.49) |
| 28.0≤BMI<34.9 | -0.09 (-0.19, 0.02) | 0.02 (-0.09, 0.13) | -0.16 (-0.24, -0.07) | -0.12 (-0.21, -0.03) | 1.26 (0.50, 2.02) | 1.96 (1.18, 2.75) |
| BMI≥35.0 | -0.40 (-0.94, 0.15) | -0.26 (-0.84, 0.32) | -0.35 (-0.82, 0.12) | -0.28 (-0.78, 0.22) | -0.72 (-4.64, 3.19) | 0.19 (-3.64, 4.02) |
| People at risk of COPD | BMI<18.5 | -0.69 (-0.79, -0.59) | -0.67 (-0.78, -0.56) | -0.57(-0.66, -0.49) | -0.56 (-0.65, -0.46) | -2.49 (-3.02, -1.95) | -2.22 (-2.80, -1.65) |
| 18.5≤BMI<23.9 | Ref | Ref | Ref | Ref | Ref | Ref |
| 24.0≤BMI<27.9 | 0.15 (0.10, 0.21) | 0.31 (0.25, 0.38) | 0.00 (-0.01, 0.01) | 0.00 (-0.01,0.02) | 1.58 (1.24, 1.92) | 2.46 (2.10, 2.83) |
| 28.0≤BMI<34.9 | 0.18( 0.09, 0.28) | 0.33 (0.22, 0.43) | 0.00 (-0.03, 0.03) | 0.00 (-0.02, 0.03) | 1.98 (1.43, 2.53) | 2.96 (2.39, 3.53) |
| BMI≥35.0 | -0.22 (-0.77, 0.33) | -0.23 (-0.81, 0.35) | -0.32 (-0.81, 0.17) | -0.42 (-0.92, 0.09) | 0.59 (-2.80, 3.99) | 1.47 (-1.96, 4.90) |
| Female | People not at risk of COPD | BMI<18.5 | -0.57 (-0.90, -0.24) | -0.83 (-1.19, -0.47) | -0.25 (-0.52, 0.02) | -0.42 (-0.72, -0.13) | -4.00 (-5.81, -2.19) | -4.30 (-6.15, -2.46) |
| 18.5≤BMI<23.9 | Ref | Ref | Ref | Ref | Ref | Ref |
| 24.0≤BMI<27.9 | -0.24 (-0.33, -0.15) | -0.06 (-0.16, 0.04) | -0.22 (-0.29, -0.14) | -0.09 (-0.17, -0.01) | 0.21 (-0.36, 0.78) | 0.64 (0.06, 1.23) |
| 28.0≤BMI<34.9 | -0.55 (-0.67, -0.43) | -0.29 (-0.42, -0.16) | -0.45 (-0.55, -0.35) | -0.27 (-0.38, -0.16) | -0.47 (-1.21, 0.27) | 0.34 (-0.42, 1.10) |
| BMI≥35.0 | -0.99 (-1.52, -0.46) | -0.72 (-1.29, -0.16) | -0.80 (-1.24, -0.35) | -0.63 (-1.10, -0.15) | -0.25 (-3.55, 3.06) | 0.81 (-2.41, 4.03) |
| People at risk of COPD | BMI<18.5 | -0.51 (-0.68,-0.34) | -0.49 (-0.69, -0.30) | -0.32 (-0.47, -0.18) | -0.25 (-0.41, -0.09) | -2.56 (-3.35, -1.78) | -2.82 (-3.65 -1.98) |
| 18.5≤BMI<23.9 | Ref | Ref | Ref | Ref | Ref | Ref |
| 24.0≤BMI<27.9 | 0.15 (0.06, 0.24) | 0.34 (0.24, 0.45) | 0.11 (0.02, 0.19) | 0.23 (0.14, 0.33) | 0.75 (0.25, 1.25) | 1.62 (1.10, 2.15) |
| 28.0≤BMI<34.9 | -0.06 (-0.20, 0.08) | 0.20 (0.04, 0.36) | -0.09 (-0.21, 0.04) | 0.07 (-0.07, 0.21) | 0.68 (-0.07, 1.42) | 1.99 (1.23, 2.75) |
| BMI≥35.0 | -0.23 (-0.88, 0.43) | 0.40 (-0.24, 1.05) | -0.27 (-0.84, 0.31) | 0.22 (-0.36, 0.80) | 0.57 (-2.82, 3.96) | 2.52 (-0.71, 5.75) |

Abbreviations: BMI, body mass index; COPD-SQ, the COPD Screening Questionnaire; COPD, Chronic Obstructive Pulmonary Disease; PRISm preserved ratio impaired spirometry; FEV1, the forced expiratory volume in one second; FVC, the forced vital capacity.

Adjusted model: sex, age, smoke, cough, breath shortness, biofuel use and family history

**Supplement table 7.** The relationship between BMI and lung function according to lung function test among participants older than 40 years old.

| Participants | | BMI | FEV1 | | FVC | | FEV1/FVC | |
| --- | --- | --- | --- | --- | --- | --- | --- | --- |
| unadjusted | adjusted | unadjusted | adjusted | unadjusted | adjusted |
| Total | People with normal spirometry | BMI<18.5 | -0.45（-0.60，-0.29） | -0.22 (-0.44, -0.01) | -0.31 (-0.43, -0.19) | -0.12 (-0.28,0.05) | -1.96 (-3.52, -0.40) | -1.44 (-2.94, 0.06) |
| 18.5≤BMI<23.9 | Ref | Ref | Ref | Ref | Ref | Ref |
| 24.0≤BMI<27.9 | 0.08 (0.03, 0.13) | -0.01 (-0.08, 0.07) | 0.03 (-0.02, 0.07) | -0.08 (-0.14, -0.02) | 1.37 (0.86, 1.88) | 1.29 (0.77, 1.80) |
| 28.0≤BMI<34.9 | -0.10 (-0.17, -0.02) | -0.28 (-0.39, -0.16) | -0.12 (-0.18, -0.06) | -0.30 (-0.39, -0.21) | 1.29 (0.57, 2.01) | 1.18 (0.45, 1.91) |
| BMI≥35.0 | -0.83 (-1.29, -0.38) | -0.99 (-1.68, -0.29) | -0.64 (-1.00, -0.29) | -0.69 (-1.21, -0.17) | 0.43 (-3.50, 4.37) | 0.04 (-3.96, 4.05) |
| People with PRISm | BMI<18.5 | -0.71 (-0.96, -0.46) | -0.63 (-0.94, -0.31) | -0.46 (-0.65, -0.27) | -0.37 (-0.60, -0.14) | -0.09 (-1.49, 1.31) | -0.08 (-1.39, 1.24) |
| 18.5≤BMI<23.9 | Ref | Ref | Ref | Ref | Ref | Ref |
| 24.0≤BMI<27.9 | 0.21 (0.10, 0.31) | 0.22 (0.08, 0.37) | 0.14 (0.05, 0.22) | 0.13 (0.02, 0.23) | 0.12 (-0.44, 0.69) | 0.15 (-0.42, 0.72) |
| 28.0≤BMI<34.9 | 0.14 (-0.01, 0.29) | 0.24 (0.03, 0.45) | 0.12 (0.00, 0.23) | 0.19 (0.04, 0.34) | -0.50 (-1.36, 0.37) | -0.55 (-1.44, 0.33) |
| BMI≥35.0 | -0.01 (-0.73, 0.71) | 0.20 (-0.78, 1.17) | 0.05 (-0.49, 0.59) | 0.21 (-0.50, 0.92) | -1.16 (-5.69, 3.36) | -0.99 (-5.51, 3.54) |
| People with obstructive spirometry | BMI<18.5 | -0.81 (-0.96, -0.65) | -0.80 (-0.97, -0.63) | -0.53 (-0.63, 0.43) | -0.53 (-0.65, -0.42) | -2.79 (-3.61, -1.97) | -2.65 (-3.51, -1.78) |
| 18.5≤BMI<23.9 | Ref | Ref | Ref | Ref | Ref | Ref |
| 24.0≤BMI<27.9 | 0.22 (0.14, 0.30) | 0.26 (0.17, 0.36) | 0.00 (-0.01, -0.01) | 0.00 (-0.01, 0.01) | 2.35 (1.71, 3.00) | 2.36 (1.69, 3.03) |
| 28.0≤BMI<34.9 | 0.15 (0.03, 0.27) | 0.27 (0.13, 0.42) | -0.03 (-0.11, 0.05) | 0.00 (-0.03, 0.03) | 4.19 (3.05, 5.32) | 4.26 (3.09, 5.43) |
| BMI≥35.0 | -0.19 (-0.81, 0.43) | 0.09 (-0.62, 0.80) | -0.41 (-0.87, 0.06) | -0.29 (-0.81, 0.24) | 9.50 (2.48, 16.52) | 10.50 (3.28, 17.72) |
| Male | People with normal spirometry | BMI<18.5 | -0.81 (-1.08, -0.54) | -0.40 (-0.71, -0.09) | -0.54 (-0.75, -0.33) | -0.21 (-0.44, 0.02) | -2.59 (-4.89, -0.30) | -1.98 (-4.21, 0.25) |
| 18.5≤BMI<23.9 | Ref | Ref | Ref | Ref | Ref | Ref |
| 24.0≤BMI<27.9 | 0.24 (0.16, 0.33) | -0.01 (-0.11,0.10) | 0.10 (0.03, 0.17) | -0.11 (-0.19, -0.03) | 2.30 (1.57, 3.03) | 1.92 (1.19, 2.66) |
| 28.0≤BMI<34.9 | 0.30 (0.17, 0.42) | -0.15 (-0.31, 0.01) | 0.12 (0.02, 0.22) | -0.25 (-0.37, -0.12) | 2.66 (1.62, 3.70) | 2.20 (1.13, 3.28) |
| BMI≥35.0 | -0.05 (-0.91, 0.81) | -0.96 (-2.10, 0.17) | 0.01 (-0.67, 0.69) | -0.52 (-1.34, 0.31) | -0.79 (-8.36, 6.78) | -2.61 (-10.38, 5.16) |
| People with PRISm | BMI<18.5 | -0.89 (-1.19, -0.58) | -0.68 (-1.05, -0.32) | -0.59 (-0.82, -0.35) | -0.41 (-0.68, -0.14) | -0.04 (-1.79, 1.71) | 0.01 (-1.51, 1.53) |
| 18.5≤BMI<23.9 | Ref | Ref | Ref | Ref | Ref | Ref |
| 24.0≤BMI<27.9 | 0.28 (0.13, 0.43) | 0.25 (0.08, 0.43) | 0.18 (0.07, 0.30) | 0.16 (0.03, 0.28) | 0.16 (-0.55, 0.87) | 0.07 (-0.64, 0.79) |
| 28.0≤BMI<34.9 | 0.56 (0.34, 0.78) | 0.31 (0.05, 0.57) | 0.42 (0.25, 0.58) | 0.25 (0.07, 0.44) | -0.68 (-1.91, 0.56) | -1.00 (-2.32, 0.31) |
| BMI≥35.0 | 0.90 (-0.30, 2.09) | 0.82 (-0.54, 2.17) | 0.76 (-0.14, 1.65) | 0.691 (-0.28, 1.66) | -3.33 (-11.02, .4.36) | -3.79 (-11.81, 4.23) |
| People with obstructive spirometry | BMI<18.5 | -0.83 (-1.00, -0.65) | -0.78 (-0.98, -0.59) | -0.62 (-0.74, -0.51) | -0.56 (-0.69, -0.44) | -2.45 (-3.42, -1.47) | -2.10 (-3.13, -1.07) |
| 18.5≤BMI<23.9 | Ref | Ref | Ref | Ref | Ref | Ref |
| 24.0≤BMI<27.9 | 0.26 (0.17, 0.35) | 0.26 (0.15, 0.36) | 0.00 (-0.01, 0.01) | 0.00 (-0.01, 0.01) | 1.89 (1.15, 2.64) | 2.09 (1.31, 2.87) |
| 28.0≤BMI<34.9 | 0.31 (0.16, 0.46) | 0.23 (0.06, 0.41) | 0.00 (-0.02, 0.02) | -0.01 (-0.09, 0.07) | 4.08 (2.63, 5.52) | 4.39 (2.90, 5.89) |
| BMI≥35.0 | -0.39 (-1.33, 0.56) | -0.73 (-1.77, 0.31) | -0.50 (-1.19, 0.19) | -0.80 (-1.54, -0.05) | 3.29 (-4.33, 10.91) | 3.72 (-4.19, 11.62) |
| Female | People with normal spirometry | BMI<18.5 | -0.51 (-0.80, -0.22） | -0.05 (-0.35, 0.25) | -0.36（-0.59，-0.13） | 0.00 (-0.24, 0.24) | -1.48 (-3.60, 0.65) | -1.15 (-3.18, 0.88) |
| 18.5≤BMI<23.9 | Ref | Ref | Ref | Ref | Ref | Ref |
| 24.0≤BMI<27.9 | -0.04（-0.14，-0.06） | -0.05 (-0.16, 0.06) | -0.06 (-0.14, 0.02) | -0.08 (-0.17, 0.01) | 0.49 (-0.23, 1.20） | 0.57 (-0.15, 1.29) |
| 28.0≤BMI<34.9 | -0.40（-0.54，-0.26） | -0.51 (-0.68, -034) | -0.33 (-0.45, -0.21) | -0.42 (-0.54,-0.29) | -0.08 (-1.09, 0.93) | 0.10 (-0.91, 1.11) |
| BMI≥35.0 | -1.15（-1.89，-0.41） | -1.14 (-2.04, -0.25) | -0.88 (-1.46, -0.31) | -0.88 (-1.55, -0.20） | 0.16 (-4.51, 4.82) | 0.64 (-3.92, 5.20) |
| People with PRISm | BMI<18.5 | -0.79 (-1.30, -0.29) | -0.44 (-1.07, 0.18) | -0.51 (-0.88, -0.13) | -0.24 (-0.69, 0.20) | -0.09 (-2.39, 2.20) | -0.30 (-2.55, 1.95) |
| 18.5≤BMI<23.9 | Ref | Ref | Ref | Ref | Ref | Ref |
| 24.0≤BMI<27.9 | 0.13 (-0.09, 0.35) | 0.15 (-0.12, 0.42) | 0.07 (-0.09, 0.23) | 0.06 (-0.13, 0.26) | 0.09 (-0.85, 1.04) | 0.17 (-0.78, 1.13) |
| 28.0≤BMI<34.9 | -0.11 (-0.40, 0.17) | 0.04 (-0.32, 0.39) | -0.06 (-0.27, 0.15) | 0.04 (-0.22, 0.29) | -0.47 (-1.74, 0.80) | -0.39 (-1.66, 0.88) |
| BMI≥35.0 | -0.69 (-1.94, 0.56) | -0.62 (-2.12, 0.88) | -0.45 (-1.38, 0.48) | -0.37 (-1.47, 0.72) | 0.01 (-5.68, 5.69) | -0.13 (-5.81, 5.54） |
| People with obstructive spirometry | BMI<18.5 | -0.81 (-1.16, -0.45) | -0.82 (-1.21, -0.42) | -0.36 (-0.59, -0.13) | -0.32 (-0.58, -0.06) | -3.89 (-5.45, -2.33) | -3.93 (-5.55, -2.31) |
| 18.5≤BMI<23.9 | Ref | Ref | Ref | Ref | Ref | Ref |
| 24.0≤BMI<27.9 | 0.42 (0.23, 0.61) | 0.35 (0.14, 0.56) | 0.23 (0.11, 0.36) | 0.17 (0.03, 0.31) | 3.16 (1.89, 4.42) | 3.11 (1.81, 4.42) |
| 28.0≤BMI<34.9 | 0.32 (0.06, 0.58) | 0.32 (0.03, 0.62) | 0.14 (-0.03, 0.32) | 0.11 (-0.08, 0.31) | 3.63 (1.78, 5.49) | 3.98 (2.06, 5.91) |
| BMI≥35.0 | 0.65 (-0.29, 1.59) | 0.87 (-0.14, 1.88) | 0.16 (-0.51, 0.84) | 0.22 (-0.47, 0.92) | 20.28 (4.72, 35.84) | 23.69 (7.12, 40.26) |

Abbreviations: BMI, body mass index; COPD, Chronic Obstructive Pulmonary Disease; PRISm preserved ratio impaired spirometry; FEV1, the forced expiratory volume in one second; FVC, the forced vital capacity.

Adjusted model: sex, age, smoke, cough, breath shortness, biofuel use and family history

**Supplement table 8.** The relationship between BMI and lung function according to COPD-SQ scores among non-smokers.

| Participants | | BMI | FEV1 | | FVC | | FEV1/FVC | |
| --- | --- | --- | --- | --- | --- | --- | --- | --- |
| unadjusted | adjusted | unadjusted | adjusted | unadjusted | adjusted |
| Total | People not at risk of COPD | BMI<18.5 | -0.05 (-0.23, -0.13) | -0.50 (-0.72, -0.27) | 0.06 (-0.08, 0.20) | -0.23 (-0.43, -0.04) | -2.87 (-4.10, -1.64) | -3.45 (-4.71, -2.20) |
| 18.5≤BMI<23.9 | Ref | Ref | Ref | Ref | Ref | Ref |
| 24.0≤BMI<27.9 | -0.14 (-0.20, -0.08) | 0.00 (-0.07, 0.07) | -0.13 (-0.18, -0.08) | -0.05 (-0.11, 0.07) | 0.28 (-0.15, 0.71) | 0.92 (0.47, 1.37) |
| 28.0≤BMI<34.9 | -0.30 (-0.37, -0.22) | -0.14 (-0.24, -0.05) | -0.24 (-0.31, -0.18) | -0.16 (-0.24, -0.08) | -0.40 (-0.97, 0.17) | 0.46 (-0.13, 1.05) |
| BMI≥35.0 | -0.45 (-0.81, -0.09) | -0.33 (-0.75, 0.09) | -0.26 (-0.56, 0.00) | -0.16 (-0.52, 0.19) | -0.52 (-3.10, 2.05) | 0.46 (-2.14, 3.07) |
| People at risk of COPD | BMI<18.5 | -0.54 (-0.68, -0.39) | -0.66 (-0.82, -0.50) | -0.39 (-0.51, -0.27) | -0.46 (-0.60, -0.33) | -2.19 (-2.87, -1.50) | -2.79 (-3.52, -2.05) |
| 18.5≤BMI<23.9 | Ref | Ref | Ref | Ref | Ref | Ref |
| 24.0≤BMI<27.9 | 0.10 (0.02, 0.18) | 0.34 (0.25, 0.43) | 0.05 (-0.02, 0.11) | 0.21 (0.14, 0.29) | 0.80 (0.36, 1.24) | 1.71 (1.25, 2.18) |
| 28.0≤BMI<34.9 | -0.16 (-0.28, -0.03) | 0.17 (0.02, 0.31) | -0.20 (-0.31, -0.10) | 0.02 (-0.10, 0.15) | 0.84 (0.15, 1.53) | 2.00 (1.29, 2.71) |
| BMI≥35.0 | -0.25 (-0.81, 0.31) | 0.19 (-0.41, 0.79) | -0.27 (-0.76, 0.21) | 0.02 (-0.52, 0.57) | 0.27 (-2.75, 3.29) | 2.04 (-0.88, 4.97) |
| Male | People not at risk of COPD | BMI<18.5 | -0.05 (-0.35, 0.26) | -0.31 (-0.65, 0.03) | 0.12 (-0.14, 0.38) | -0.04 (-0.34, 0.25) | -3.40 (-5.27, -1.54) | -3.93 (-5.84, -2.01) |
| 18.5≤BMI<23.9 | Ref | Ref | Ref | Ref | Ref | Ref |
| 24.0≤BMI<27.9 | -0.09 (-0.18, 0.01) | 0.04 (-0.07, 0.15) | -0.11 (-0.19, -0.03) | -0.02 (-0.12, 0.07) | 0.75 (0.04, 1.47) | 1.20 (0.45, 1.95) |
| 28.0≤BMI<34.9 | -0.07 (-0.20, 0.06) | -0.01 (-0.16, 0.13) | -0.09 (-0.20, 0.02) | -0.06 (-0.19, 0.07) | 0.29 (-0.68, 1.26) | 0.63 (-0.38, 1.63) |
| BMI≥35.0 | 0.14 (-0.50, 0.77) | 0.24 (-0.47, 0.95) | 0.52 (0.02, 1.02) | 0.62 (0.08, 1.17) | -2.57 (-6.61, 1.47) | -1.74 (-5.73, 2.24) |
| People at risk of COPD | BMI<18.5 | -0.62 (-0.86, -0.38) | -0.80 (-1.06, -0.54) | -0.54 (-0.75, -0.33) | -0.67 (-0.89, -0.44) | -1.82 (-3.06, -0.57) | -2.26 (-3.58, -0.95) |
| 18.5≤BMI<23.9 | Ref | Ref | Ref | Ref | Ref | Ref |
| 24.0≤BMI<27.9 | 0.14 (0.01, 0.27) | 0.33 (0.18, 0.48) | 0.04 (-0.07, 0.16) | 0.16 (0.03, 0.29) | 1.13 (0.35, 1.90) | 1.97 (1.15, 2.79) |
| 28.0≤BMI<34.9 | 0.07 (-0.17, 0.30) | 0.18 (-0.08, 0.44) | -0.03 (-0.23, 0.18) | 0.01 (-0.21, 0.24) | 1.32 (-0.08, 2.73) | 2.17 (0.72, 3.61) |
| BMI≥35.0 | -0.24 (-1.17, 0.70) | -0.14 (-1.11, 0.84) | -0.27 (-1.10, 0.56) | -0.26 (-1.15, 0.63) | -0.46 (-5.69, 4.76) | 0.73 (-4.58, 6.03) |
| Female | People not at risk of COPD | BMI<18.5 | -0.11 (-0.38, 0.16) | -0.63 (-0.94, -0.32) | 0.02 (-0.21, 0.24) | -0.36 (-0.62, -0.10) | -2.46 (-4.11, -0.82) | -3.12 (-4.79, -1.46) |
| 18.5≤BMI<23.9 | Ref | Ref | Ref | Ref | Ref | Ref |
| 24.0≤BMI<27.9 | -0.37 (-0.45, -0.28) | -0.06 (-0.16, 0.04) | -0.32 (-0.39, -0.25) | -0.09 (-0.17, -0.01) | 0.08 (-0.46, 0.63) | 0.68 (0.11, 1.25) |
| 28.0≤BMI<34.9 | -0.64 (-0.76, -0.53) | -0.30 (-0.43, -0.17) | -0.52 (-0.62, -0.42) | -0.27 (-0.38, -0.16) | -0.76 (-1.48, -0.04) | 0.20 (-0.54, 0.94) |
| BMI≥35.0 | -0.92 (-1.41, -0.42) | -0.69 (-1.23, -0.15) | -0.80 (-1.22, -0.38) | -0.67 (-1.12, -0.21) | 0.47 (-2.72, 3.65) | 1.55 (-1.58, 4.69) |
| People at risk of COPD | BMI<18.5 | -0.50 (-0.68, -0.32) | -0.57 (-0.77, -0.36) | -0.34 (-0.50, -0.18) | -0.33 (-0.51, 0.16) | -2.45 (-3.29, -1.61) | -3.01 (-3.90, -2.11) |
| 18.5≤BMI<23.9 | Ref | Ref | Ref | Ref | Ref | Ref |
| 24.0≤BMI<27.9 | 0.11 (0.01, 0.21) | 0.35 (0.24, 0.47) | 0.08 (-0.01, 0.17) | 0.25 (0.15, 0.35) | 0.61 (0.08, 1.15) | 1.60 (1.03, 2.16) |
| 28.0≤BMI<34.9 | -0.17 (-0.32, -0.01) | 0.15 (-0.03, 0.32) | -0.19 (-0.33, -0.05) | 0.02 (-0.14, 0.17) | 0.49 (-0.32, 1.29) | 1.91 (1.08, 2.73) |
| BMI≥35.0 | -0.26 (-0.99, 0.46) | 0.32 (-0.42, 1.07) | -0.30 (-0.95, 0.34) | 0.14 (-0.54, 0.82) | 0.58 (-3.13, 4.30) | 2.56 (-1.02, 6.15) |

Abbreviations: BMI, body mass index; COPD-SQ, the COPD Screening Questionnaire; COPD, Chronic Obstructive Pulmonary Disease; PRISm preserved ratio impaired spirometry; FEV1, the forced expiratory volume in one second; FVC, the forced vital capacity.

Adjusted model: sex, age, smoke, cough, breath shortness, biofuel use and family history

**Supplement table 9.** The relationship between BMI and lung function according to lung function test among non-smokers.

| Participants | | BMI | FEV1 | | FVC | | FEV1/FVC | |
| --- | --- | --- | --- | --- | --- | --- | --- | --- |
| unadjusted | adjusted | unadjusted | adjusted | unadjusted | adjusted |
| Total | People with normal spirometry | BMI<18.5 | -0.17 (-0.35, 0.00) | -0.17 (-0.43, 0.09) | -0.12 (-0.26, 0.03) | -0.09 (-0.29, 0.12) | -1.31 (-3.03, 0.42) | -1.21 (-2.95, 0.54) |
| 18.5≤BMI<23.9 | Ref | Ref | Ref | Ref | Ref | Ref |
| 24.0≤BMI<27.9 | -0.03 (-0.09, 0.04) | -0.06 (-0.15, 0.03) | -0.03 (-0.08, 0.02) | -0.08 (-0.15, 0.00) | 0.27 (-0.34, 0.87) | 0.46 (-0.16, 1.07) |
| 28.0≤BMI<34.9 | -0.20 (-0.30, -0.11) | -0.38 (-0.53, -0.24) | -0.18 (-0.26, -0.10) | -0.33 (-0.44, -0.22) | 0.03 (-0.83, 0.89) | 0.22 (-0.65, 1.10) |
| BMI≥35.0 | -0.62 (-1.10, -0.14) | -1.28 (-2.05, -0.52) | -0.50 (-0.89, -0.11) | -0.96 (-1.53, -0.39) | 0.03 (-3.97, 4.04) | 0.47 (-3.55, 4.49) |
| People with PRISm | BMI<18.5 | -0.41 (-0.75, -0.07) | -0.40 (-0.85, 0.04) | -0.26 (-0.51, 0.00) | -0.21 (-0.54, 0.11) | -0.41 (-2.34, 1.53) | -0.31 (-2.41, 1.58) |
| 18.5≤BMI<23.9 | Ref | Ref | Ref | Ref | Ref | Ref |
| 24.0≤BMI<27.9 | 0.05 (-0.09, 0.19) | 0.09 (-0.11, 0.29) | 0.04 (-0.07, 0.15) | 0.06 (-0.08, 0.20) | -0.13 (-0.92, 0.67) | -0.11 (-0.91, 0.69) |
| 28.0≤BMI<34.9 | -0.07 (-0.26, 0.12) | 0.12 (-0.15, 0.39) | -0.03 (-0.17, 0.12) | 0.10 (-0.09, 0.30) | -0.76 (-1.86, 0.34) | -0.64 (-1.74, 0.46) |
| BMI≥35.0 | -0.46 (-1.36, 0.43) | -0.38 (-1.59, 0.84) | -0.27 (-0.95, 0.41) | -0.13 (-1.03, 0.77) | -1.00 (-6.27, 4.26) | -0.90 (-6.09, 4.29) |
| People with obstructive spirometry | BMI<18.5 | -0.93 (-1.20, -0.66) | -1.06 (-1.36, -0.76) | -0.51 (-0.68, -0.34) | -0.58, (-0.79, -0.38) | -3.67 (-4.96, -2.39) | -4.10 (-5.45, -2.75) |
| 18.5≤BMI<23.9 | Ref | Ref | Ref | Ref | Ref | Ref |
| 24.0≤BMI<27.9 | 0.19 (0.07, 0.31) | 0.22 (0.07, 0.37) | 0.08 (0.00, 0.16) | 0.09 (-0.01, 0.19) | 2.56 (1.58, 3.54) | 2.52 (1.50, 3.53) |
| 28.0≤BMI<34.9 | 0.20 (0.03, 0.37) | 0.22 (0.01, 0.43) | 0.07 (-0.05, 0.18) | 0.04 (-0.10, 0.19) | 3.60 (2.11, 5.09) | 3.67 (2.13, 5.22) |
| BMI≥35.0 | 0.60 (0.01, 1.18) | 1.02 (0.24, 1.80) | 0.37 (0.01, 0.73) | 0.56 (0.12, 0.99) | 8.15 (0.20, 16.10) | 9.57 (1.41, 17.74) |
| Male | People with normal spirometry | BMI<18.5 | -0.18 (-0.56, 0.20) | -0.24 (-0.74, 0.26) | 0.00 (-0.31, 0.30) | 0.04 (-0.34, 0.42) | -5.11 (-8.96, -1.26) | -5.09 (-9.00, -1.19) |
| 18.5≤BMI<23.9 | Ref | Ref | Ref | Ref | Ref | Ref |
| 24.0≤BMI<27.9 | 0.01 (-0.12, 0.14) | -0.06 (-0.23, 0.11) | 0.00 (-0.11, 0.11) | -0.05 (-0.18, 0.08) | 0.21 (-0.97, 1.39) | 0.15 (-1.04, 1.34) |
| 28.0≤BMI<34.9 | 0.15 (-0.04, 0.33) | -0.15 (-0.40, 0.10) | 0.08 (-0.08, 0.23) | -0.17 (-0.37, 0.03) | 1.01 (-0.69, 2.70) | 0.57 (-1.17, 2.31) |
| BMI≥35.0 | -0.22 (-1.15, 0.71) | -0.84 (-2.17, 0.48) | -0.04 (-0.79, 0.71) | -0.35 (-1.32, 0.62) | -4.37 (-13.60, 4.86) | -5.05 (-14.56, 4.47) |
| People with PRISm | BMI<18.5 | -0.53 (-1.06, 0.00) | -0.40 (-1.03, 0.23) | -0.28 (-0.69, 0.13) | -0.16 (-0.63, 0.31) | -1.82 (-5.40, 1.76) | -1.30 (-4.76, 2.16) |
| 18.5≤BMI<23.9 | Ref | Ref | Ref | Ref | Ref | Ref |
| 24.0≤BMI<27.9 | 0.03 (-0.20, 0.27) | 0.02 (-0.28, 0.32) | 0.08 (-0.10, 0.26) | 0.09 (-0.13, 0.30) | -1.36 (-2.81, 0.10) | -1.33 (-2.80, 0.14) |
| 28.0≤BMI<34.9 | 0.31 (-0.03, 0.65) | 0.23 (-0.20, 0.66) | 0.29 (0.03, 0.55) | 0.24 (-0.07, 0.55) | -1.70 (-3.82, 0.43) | -1.82 (-4.00, 0.37) |
| BMI≥35.0 | -0.62 (-2.24, 1.00) | -0.30 (-2.36, 1.76) | -0.07 (-1.39, 1.24) | 0.27 (-1.39, 1.93) | -15.10 (-35.28, 5.08) | -12.54 (-32.55, 7.46) |
| People with obstructive spirometry | BMI<18.5 | -0.96 (-1.37, -0.54) | -1.11 (-1.56, -0.66) | -0.61 (-0.89, -0.34) | -0.75 (-1.06, -0.44) | -3.88 (-6.03, -1.74) | -3.77 (-6.01, -1.53) |
| 18.5≤BMI<23.9 | Ref | Ref | Ref | Ref | Ref | Ref |
| 24.0≤BMI<27.9 | 0.17 (0.00, 0.34) | 0.06 (-0.15, 0.27) | 0.09 (-0.03, 0.21) | -0.01 (-0.16, 0.13) | 1.40 (-0.07, 2.88) | 1.43 (-0.10, 2.95) |
| 28.0≤BMI<34.9 | 0.34 (0.09, 0.58) | 0.04 (-0.26, 0.34) | 0.18 (0.01, 0.35) | -0.09 (-0.30, 0.13) | 3.50 (1.05, 5.95) | 3.16 (0.64, 5.68) |
| BMI≥35.0 | 0.86 (-0.07, 1.79) | 0.80 (-0.47, 2.06) | 0.70 (0.23, 1.18) | 0.68 (0.01, 1.35) | -0.59 (-9.30, 8.12) | 0.61 (-8.09, 9.30) |
| Female | People with normal spirometry | BMI<18.5 | -0.24 (-0.50, 0.02) | -0.15 (-0.46, 0.15) | -0.21 (-0.42, 0.00) | -0.15 (-0.39, 0.10) | -0.23 (-2.14, 1.67) | -0.08 (-2.00, 1.84) |
| 18.5≤BMI<23.9 | Ref | Ref | Ref | Ref | Ref | Ref |
| 24.0≤BMI<27.9 | -0.22 (-0.31, -0.12) | -0.08 (-0.20, 0.03) | -0.20 (-0.28, -0.12) | -0.10 (-0.20, -0.01) | 0.26 (-0.45, 0.97) | 0.55 (-0.17, 1.26) |
| 28.0≤BMI<34.9 | -0.54 (-0.68, -0.40) | -0.55 (-0.72, -0.38) | -0.45 (-0.56, -0.33) | -0.45 (-0.58, -0.31) | -0.31 (-1.32, 0.70) | 0.07 (-0.95, 1.08) |
| BMI≥35.0 | -1.18 (-1.88, -0.47) | -1.55 (-2.49, -0.61) | -1.01 (-1.57, -0.45) | -1.27 (-1.97, -0.58) | 1.19 (-3.10, 5.47) | 1.83 (-2.41, 6.07) |
| People with PRISm | BMI<18.5 | -0.60 (-1.09, -0.11) | -0.39 (-1.01, 0.22) | -0.41 (-0.77, -0.04) | -0.25 (-0.69, 0.19) | 0.16 (-2.15, 2.47) | 0.07 (-2.23, 2.36) |
| 18.5≤BMI<23.9 | Ref | Ref | Ref | Ref | Ref | Ref |
| 24.0≤BMI<27.9 | -0.12 (-0.33, 0.08) | 0.13 (-0.14, 0.40) | -0.11 (-0.27, 0.04) | 0.03 (-0.16, 0.23) | 0.36 (-0.59, 1.32) | 0.33 (-0.64, 1.30) |
| 28.0≤BMI<34.9 | -0.32 (-0.59, -0.05) | 0.02 (-0.33, 0.37) | -0.21 (-0.42, -0.01) | 0.02 (-0.23, 0.27) | -0.39 (-1.68, 0.89) | -0.41 (-1.70, 0.87) |
| BMI≥35.0 | -0.37 (-1.59, 0.85) | -0.42 (-1.94, 1.10) | -0.3 (-1.24, 0.58) | -0.37 (-1.46, 0.73) | 1.30 (-4.17, 6.76) | 1.22 (-4.33, 6.77) |
| People with obstructive spirometry | BMI<18.5 | -0.86 (-1.23, -0.48) | -1.00 (-1.42, -0.58) | -0.41 (-0.66, -0.16) | -0.45 (-0.73, -0.17) | -3.85 (-5.49, -2.21) | -4.18 (-5.88, -2.47) |
| 18.5≤BMI<23.9 | Ref | Ref | Ref | Ref | Ref | Ref |
| 24.0≤BMI<27.9 | 0.41 (0.22, 0.61) | 0.41 (0.19, 0.63) | 0.22 (0.09, 0.35) | 0.20 (0.05, 0.34) | 3.29 (1.97, 4.61) | 3.42 (2.06, 4.79) |
| 28.0≤BMI<34.9 | 0.31 (0.04, 0.58) | 0.32 (0.02, 0.63) | 0.13 (-0.05, 0.31) | 0.10 (-0.10, 0.31) | 3.53 (1.63, 5.43) | 3.95 (1.98, 5.91) |
| BMI≥35.0 | 0.83 (-0.13, 1.78) | 1.11 (0.08, 2.15) | 0.28 (-0.37, 0.94) | 0.37 (-0.30, 1.04) | 19.83 (3.85, 35.81) | 22.09 (5.67, 38.51) |

Abbreviations: BMI, body mass index; COPD, Chronic Obstructive Pulmonary Disease; PRISm preserved ratio impaired spirometry; FEV1, the forced expiratory volume in one second; FVC, the forced vital capacity.

Adjusted model: sex, age, smoke, cough, breath shortness, biofuel use and family history

**Supplement table 10.** The relationship between BMI and lung function according to COPD-SQ scores using predicted value.

|  |  | Not at risk | | At risk | |
| --- | --- | --- | --- | --- | --- |
|  |  | FEV1 predicted | FVC predicted | FEV1 predicted | FVC predicted |
| Total | BMI<18.5 | -1.36 (-1.91, -0.82) | -1.00 (-1.50, -0.50) | -1.28 (-1.49, -1.06) | -1.17 (-1.29, -0.96) |
|  | 18.5≤BMI<23.9 | Ref | Ref | Ref | Ref |
|  | 24.0≤BMI<27.9 | -0.07 (-0.23, 0.10) | -0.05 (-0.19, 0.09) | 0.24 (0.12, 0.36) | 0.00 (-0.04, 0.04) |
|  | 28.0≤BMI<34.9 | -0.35 (-0.57, -0.14) | -0.41 (-0.61, -0.22) | 0.27 (0.08, 0.46) | -0.08 (-0.28, 0.11) |
|  | BMI≥35.0 | -0.34 (-1.33, 0.66) | -1.06 (-1.96, -0.16) | 1.02 (0.23, 1.80) | -0.40 (-1.45, 0.64) |
| Male | BMI<18.5 | -1.37 (-2.25, -0.48) | -0.73 (-1.52, 0.05) | -1.81 (-2.10, -1.53) | -1.66 (-1.94, -1.38) |
|  | 18.5≤BMI<23.9 | Ref | Ref | Ref | Ref |
|  | 24.0≤BMI<27.9 | 0.03 (-0.22, 0.29) | -0.20 (-0.41, 0.00) | 0.24 (0.08, 0.40) | -0.02 (-0.10, 0.05) |
|  | 28.0≤BMI<34.9 | -0.33 (-0.67, 0.00) | -0.56 (-0.84, -0.28) | 0.32 (0.04, 0.59) | -0.07 (-0.33, 0.19) |
|  | BMI≥35.0 | 0.85 (-0.84, 2.55) | 0.07 (-1.19, 1.33) | -1.18 (-2.78, 0.42) | -1.17 (-2.75, 0.42) |
| female | BMI<18.5 | -1.41 (-2.10, -0.72) | -1.15 (-1.81, -0.49) | -0.60 (-0.93, -0.26) | -0.29 (-0.64, 0.06) |
|  | 18.5≤BMI<23.9 | Ref | Ref | Ref | Ref |
|  | 24.0≤BMI<27.9 | -0.01 (-0.22, 0.20) | -0.04 (-0.24, 0.16) | 0.22 (0.04, 0.41) | 0.28 (0.09, 0.48) |
|  | 28.0≤BMI<34.9 | -0.29 (-0.57, -0.01) | -0.38 (-0.65, -0.12) | 0.03 (-0.25, 0.31) | -0.03 (-0.33, 0.27) |
|  | BMI≥35.0 | -1.03 (-2.28, 0.21) | -1.83 (-3.01, -0.64) | 1.35 (0.65, 2.05) | 0.23 (-1.10, 1.57) |

Abbreviations: BMI, body mass index; COPD-SQ, the COPD Screening Questionnaire; COPD, Chronic Obstructive Pulmonary Disease; FEV1, the forced expiratory volume in one second; FVC, the forced vital capacity.

**Supplement table 11.** The relationship between BMI and lung function according to lung function test using predicted value.

|  |  | Normal spirometry | | PRISm | | Obstructive spirometry | |
| --- | --- | --- | --- | --- | --- | --- | --- |
|  |  | FEV1 predicted | FVC predicted | FEV1 predicted | FVC predicted | FEV1 predicted | FVC predicted |
| Total | BMI<18.5 | 0.23 (-0.19, 0.65) | -0.13 (-0.53, 0.27) | -2.02 (-2.82, -1.22) | -1.06 (-1.70, -0.42) | -1.89 (-2.29, -1.49) | -1.56 (-1.87, -1.24) |
|  | 18.5≤BMI<23.9 | Ref | Ref | ref | Ref | Ref | Ref |
|  | 24.0≤BMI<27.9 | -0.30 (-0.47, -0.12) | -0.19 (-0.34, -0.04) | 0.56 (0.13, 0.98) | 0.40 (0.11, 0.69) | 0.58 (0.36, 0.81) | 0.01 (-0.04, 0.05) |
|  | 28.0≤BMI<34.9 | -0.53 (-0.80, -0.26) | -0.63 (-0.86, -0.41) | 0.61 (0.01, 1.20) | 0.48 (0.08, 0.88) | 0.66 (0.32, 1.01) | -0.01 (-0.12, 0.10) |
|  | BMI≥35.0 | 1.03 (0.33, 1.72) | -1.52 (-2.77, -0.28) | 0.32 (-2.34, 2.99) | 0.56 (-1.27, 2.40) | 1.60 (0.23, 2.98) | 0.00 (-0.41, 0.40) |
| Male | BMI<18.5 | -0.81 (-1.68, 0.06) | -0.55 (-1.18, 0.09) | -2.39 (-3.40, -1.38) | -1.57 (-2.38, -0.76) | -2.24 (-2.73, -1.75) | -1.91 (-2.29, -1.53) |
|  | 18.5≤BMI<23.9 | Ref | Ref | Ref | Ref | Ref | Ref |
|  | 24.0≤BMI<27.9 | -0.65 (-0.95, -0.35) | -0.43 (-0.66, -0.21) | 0.51 (-0.05, 1.06) | 0.46 (0.08, 0.84) | 0.53 (0.26, 0.81) | 0.00 (-0.05, 0.05) |
|  | 28.0≤BMI<34.9 | -1.18 (-1.65, -0.71) | -0.86 (-1.20, -0.52) | 1.01 (-0.18, 1.84) | 0.83 (0.27, 1.38) | 0.59 (0.12, 1.05) | -0.01 (-0.13, 0.11) |
|  | BMI≥35.0 | 1.06 (-0.96, 3.08) | -1.10 (-3.23, 1.03) | 1.28 (-2.93, 5.48) | 2.52 (-0.22, 5.26) | 0.69 (-1.53, 2.92) | 0.01 (-0.27, 0.28) |
| female | BMI<18.5 | 0.59 (0.14, 1.04) | 0.20 (-0.32, 0.72) | -1.40 (-2.72, -0.09) | -0.33 (-1.38, 0.73) | -1.27 (-1.97, -0.57) | -0.57 (-1.12, -0.01) |
|  | 18.5≤BMI<23.9 | Ref | Ref | Ref | Ref | Ref | Ref |
|  | 24.0≤BMI<27.9 | -0.07 (-0.29, 0.15) | -0.03 (-0.24, 0.17) | 0.68 (0.01, 1.34) | 0.26 (-0.19, 0.71) | 0.57 (0.19, 0.96) | 0.44 (0.13, 0.76) |
|  | 28.0≤BMI<34.9 | -0.25 (-0.57, 0.07) | -0.43 (-0.73, -0.14) | 0.14 (-0.72, 1.00) | 0.16 (-0.44, 0.75) | 0.53 (0.00, 1.06) | 0.26 (-0.19, 0.70) |
|  | BMI≥35.0 | 0.99 (0.20, 1.78) | -1.37 (-2.87, 0.13) | -0.50 (-3.90, 2.90) | -0.91 (-3.34, 1.52) | 1.93 (0.27, 3.59) | 0.01 (-1.83, 1.85) |

Abbreviations: BMI, body mass index; COPD, Chronic Obstructive Pulmonary Disease; PRISm preserved ratio impaired spirometry; FEV1, the forced expiratory volume in one second; FVC, the forced vital capacity.
